1 **Title**

2 Bringing Plant Immunity to Light: A Genetically Encoded, Bioluminescent Reporter of  
3 Pattern Triggered Immunity in *Nicotiana benthamiana*

4 **Authors**

5 Anthony G. K. Garcia<sup>1</sup>, Adam D. Steinbrenner<sup>1\*</sup>

6

7 <sup>1</sup>Department of Biology, University of Washington, Seattle WA 98195 U.S.A.

8

9 \*Corresponding author: A. D. Steinbrenner; E-mail: [astein10@uw.edu](mailto:astein10@uw.edu)

10

11

12 **Keywords:** *Agrobacterium tumefaciens*, bioluminescence, *Nicotiana benthamiana*,  
13 pattern recognition receptor, pattern triggered immunity, receptor-like proteins

14

15 **Funding:** National Science Foundation Grant number: IOS-2139986, The Mary Gates  
16 Endowment for Students

17

18

19

20

21

22

23

## 24 **Abstract**

25 Plants rely on innate immune systems to defend against a wide variety of biotic  
26 attackers. Key components of innate immunity include cell-surface pattern recognition  
27 receptors (PRRs), which recognize pest/pathogen-associated molecular patterns  
28 (PAMPs). Unlike other classes of receptors which often have visible cell death immune  
29 outputs upon activation, PRRs generally lack rapid methods for assessing function.  
30 Here, we describe a genetically encoded bioluminescent reporter of immune activation  
31 by heterologously-expressed PRRs in the model organism *Nicotiana benthamiana*. We  
32 characterized *N. benthamiana* transcriptome changes in response to *Agrobacterium*  
33 *tumefaciens* (*Agrobacterium*) and subsequent PAMP treatment to identify PTI-  
34 associated marker genes, which were then used to generate promoter-luciferase fusion  
35 fungal bioluminescence pathway (FBP) constructs. A reporter construct termed  
36 *pFBP\_2xNbLYS1::LUZ* allows for robust detection of PTI activation by heterologously  
37 expressed PRRs. Consistent with known PTI signaling pathways, activation by receptor-  
38 like protein (RLP) PRRs is dependent on the known adaptor of RLP PRRs, SOBIR1.  
39 This system minimizes the amount of labor, reagents, and time needed to assay  
40 function of PRRs and displays robust sensitivity at biologically relevant PAMP  
41 concentrations, making it ideal for high throughput screens. The tools described in this  
42 paper will be powerful for studying PRR function and investigations to characterize the  
43 structure-function of plant cell surface receptors.

44

## 45 **Introduction**

46

47 Plants perceive pests and pathogens through cell surface-localized immune receptors,  
48 termed pattern recognition receptors (PRRs). Canonically, these transmembrane  
49 proteins activate pattern triggered immunity (PTI) in response to conserved pathogen  
50 associated molecular patterns (PAMPs) (Boutrot & Zipfel, 2017). PTI consists of a suite  
51 of defense signaling and outputs including reactive oxygen species (ROS) production,  
52 ethylene production, peroxidase upregulation, callose deposition, stomatal  
53 modifications, calcium oscillations, and phytohormone production (Aldon et al., 2018;  
54 Berens et al., 2017; Broekgaarden et al., 2015; Melotto et al., 2017; Mott et al., 2018; Qi  
55 et al., 2017; Toyota et al., 2018; Y. Wang et al., 2021). These outputs aid in  
56 transcriptional reprogramming to improve plant resistance against attackers (Denoux et  
57 al., 2008; Navarro et al., 2004). Understanding immune activation by PRRs is critical for  
58 developing novel strategies to improve plant resistance against pests and pathogens.

59 The model organism *Nicotiana benthamiana* represents a significant resource in the  
60 field of plant immunity, in part because of robust immune phenotypes conferred by  
61 transiently expressed intracellular plant immune receptors (Goodin et al., 2008; Buscaill  
62 et al., 2021). *Agrobacterium*-mediated transient transformation of *N. benthamiana*  
63 allows for rapid expression of proteins, which is particularly applicable for mutant  
64 screening and structure-function analysis. For example, screening cell death as a visual  
65 reporter triggered by NLR activation has allowed investigations of structural features of  
66 nucleotide-binding leucine-rich repeat (NLR) proteins (Segretin et al., 2014;  
67 Steinbrenner et al., 2015; Adachi et al., 2019).

68 Transient transformation of *N. benthamiana* similarly serves as a powerful tool for  
69 studying PRRs, but there is currently a lack of robust visual reporters of PRR function in

70 *N. benthamiana* analogous to cell death. Several cell surface immune receptors activate  
71 cell death phenotypes in other species, including leucine-rich repeat receptor-like  
72 proteins (LRR-RLPs) such as *Arabidopsis thaliana* RLP42 and *Solanum lycopersicum*  
73 Ve1, but these LRR-RLPs do not necessarily activate cell death upon heterologous  
74 expression in *N. benthamiana* or can require strong repeated elicitation (de Jonge et al.,  
75 2012; Z. Zhang et al., 2013; L. Zhang et al., 2014). Because heterologously expressed  
76 PRRs do not activate visual markers of PTI in *N. benthamiana*, immune responses  
77 mediated by transiently expressed PRRs are instead detected using early markers of  
78 PTI defense activation, including PAMP-induced ROS, ethylene, or peroxidase  
79 production (Mott et al., 2018; Steinbrenner et al., 2020). However, these assays are  
80 laborious or are hampered by the presence of *Agrobacterium* as a background source  
81 of PTI activation.

82 Reporters utilizing luminescence, fluorescence, or pigmentation have been adapted to  
83 study a variety of plant signaling processes (DeBlasio et al., 2010; Furuhata et al., 2020;  
84 He et al., 2020). However, no transiently expressed reporters of immune activation in  
85 intact *N. benthamiana* leaves have been described. A high sensitivity luciferase-based  
86 system for measuring pattern triggered immunity in protoplasts of *N. benthamiana* was  
87 previously reported (Nguyen et al., 2010), but was not tested for heterologously  
88 expressed PRRs and required external addition of luciferin. A different system using a  
89 bioluminescent strain of *Agrobacterium* expressing the bacterial *lux* operon allows for  
90 monitoring of *Agrobacterium* during transient transformation and quantification of  
91 effector triggered immunity (ETI), but has not yet been applied to PTI (Jutras et al.,  
92 2021). *N. benthamiana* lines stably expressing the fluorescent Ca<sup>2+</sup> indicator GCaMP3

93 allow for detection of signaling in response to various biotic and abiotic stresses,  
94 including signaling activated by transiently expressed receptor-like kinases (DeFalco et  
95 al., 2017). However, stable expression of GCaMP3 limits the ability to quickly test  
96 different *N. benthamiana* genotypes and mutants lacking components of the signaling  
97 pathway. Finally, fluorescent proteins and pigments are simple to measure, but lack the  
98 same low background and high sensitivity of luciferase-based assays (Haugwitz et al.,  
99 2008; Thorne et al., 2010), which limits the ability to detect the range of responses that  
100 may occur in response to an immune elicitor.

101 To develop a generic PTI reporter, we performed transcriptomic analysis of *N.*  
102 *benthamiana* upon activation of a heterologously expressed PRR and adapted  
103 endogenous markers into a luciferase-based system that retains sensitivity but  
104 eliminates the need to introduce exogenous substrate. By encoding a metabolic  
105 pathway that allows for endogenous production of fungal luciferin alongside the fungal  
106 luciferase (*LUZ*) enzyme, the fungal bioluminescence pathway (FBP) system  
107 circumvents requirements for external addition of substrate while still remaining  
108 sensitive to subtle changes in gene expression (Khakhar et al., 2020; Mitiouchkina et  
109 al., 2020). Importantly, the features of the FBP system were well-suited for a reporter  
110 system that meets several criteria to be useful for studying plant cell surface immune  
111 receptors in a heterologous system: 1) highly sensitive to biologically relevant  
112 concentrations of immune elicitors, 2) capable of rapid, low cost, and visual assessment  
113 of immune activation, and 3) robust to low numbers of biological replicates and  
114 background immune elicitation by *Agrobacterium*. Therefore, we utilized the FBP

115 system to develop a reporter of immune activation by heterologously expressed cell  
116 surface receptors.

117

## 118 **Materials and Methods**

119

### 120 **Plant Materials and Growth Conditions**

121 *N. benthamiana* plants were transplanted one week after sowing and grown at 20°C  
122 under 12-hour light and dark cycles. The seedlings were grown under humidity domes  
123 for four weeks, after which the domes were removed, and the plants were grown an  
124 additional week before infiltrations. Fully expanded, mature leaves of six-week-old  
125 plants were used for all transient expression experiments.

### 126 **Transcriptomic and qRT-PCR Analysis**

127 For RNAseq analysis, an *N. benthamiana* stable transgenic line expressing *Phaseolus*  
128 *vulgaris* INR (INR-Pv 1-5) (Steinbrenner et al., 2020) was syringe infiltrated with  
129 *Agrobacterium* GV3101 (pMP90) at OD = 0.45 expressing empty vector (EV)  
130 pEarleyGate103 (Earley et al., 2006). 24 hpi, *Agrobacterium*-treated leaves were  
131 further infiltrated with H<sub>2</sub>O or 1 μM In11 peptide and harvested after an additional 6 hpi.  
132 Total RNA was extracted using Nucleospin Plant RNA kit (#740949.250 Macherey-  
133 Nagel). RNA was used to generate Lexogen Quantseq 3' RNA seq libraries at Cornell  
134 University Institute of Biotechnology Genomics Facility. 3' reads were mapped to *N.*  
135 *benthamiana* genome v1.0.1 (Sol Genomics Network) using HISAT2 (Kim et al., 2019)

136 with options min-intronlen 60--max-intronlen 6000, counts by gene were analyzed using  
137 HTSeq-Count (Anders et al., 2015) with options -m intersection-nonempty --nonunique  
138 all, and differential expression was analyzed by DESeq2 (Love et al., 2014).

139 For qRT-PCR analysis, *N. benthamiana* plants were syringe infiltrated with  
140 *Agrobacterium* (OD600 .45) carrying either *p35s::PvINR* or pGreenII empty vector. 24  
141 hours after infiltration, tissue was treated with either water or In11 and harvested after 6  
142 hours. Total RNA was extracted using Trizol reagent (#15596018 Thermo Fisher  
143 Scientific, USA ). cDNA libraries were generated using SuperScript IV Kit (#18090050  
144 Thermo Fisher Scientific, USA). qRT-PCR reactions were conducted using Applied  
145 Biosystems PowerUp SYBR Green Master Mix (#A25742 Thermo Fisher Scientific,  
146 USA) and gene specific primer pairs (Supplementary Table S2). Changes in gene  
147 expression between water and In11 treatments were calculated using the  $\Delta\Delta Cq$   
148 method, using  $\Delta Cq$  values normalized against *N. benthamiana EF1 $\alpha$*  (D. Liu et al.,  
149 2012). Student's t-tests were performed between comparisons of *35s::PvINR* and EV  
150 treated tissue using the ggplot2 package in R (v4.1.2).

## 151 **Generation of Reporter Constructs**

152 Promoter regions of candidate marker genes were amplified from genomic DNA of *N.*  
153 *benthamiana* using primers designed against Niben v1.0.1 (Bombarely et al., 2012) with  
154 appended overhangs encoding either Bsal or Bpil restriction enzyme recognition sites  
155 (Supplementary Table S2). These primers amplified from the start codon to  
156 approximately 1.5 kb upstream. Promoter regions were then cloned into the Promoter +  
157 5' untranslated region (UTR) acceptor backbone obtained from the Golden Gate MoClo

158 Plant Toolkit (Engler et al., 2014). Double promoter constructs were constructed by  
159 reamplifying the promoter region of interest with unique overhangs and cloning into the  
160 Level -1 universal acceptor backbones using the Bsal-HFv2 restriction enzyme  
161 (#R3733L New England Biolabs, USA). These parts were then assembled into the  
162 same Promoter + 5' UTR acceptor backbone using the Bpil restriction enzyme  
163 (#ER1012 Thermo Fisher Scientific, USA).

164 Reporter constructs were generated by first modifying the P307-FBP\_6 constitutive  
165 autoluminescence construct previously described (Khakhar et al., 2020). P307-FBP\_6  
166 was a gift from Daniel Voytas (Addgene plasmid # 139697;  
167 <http://n2t.net/addgene:139697>; RRID:Addgene\_139697). To simplify the process of  
168 cloning new reporter constructs with promoter regions of interest, the CaMV35s  
169 promoter originally used to drive *LUZ* was replaced with an insert encoding a blue-white  
170 selectable marker flanked by Bsal recognition sites supplying Promoter + 5' UTR MoClo  
171 overhangs (Supplementary Fig. S2A). This allows for simple, one-step assembly  
172 reactions. The promoter regions of interest were then cloned into this acceptor plasmid  
173 using the Bsal-HFv2 restriction enzyme. A template primer pair for amplification and  
174 cloning putative promoter regions directly into the pFBP\_promoter\_acceptor construct  
175 has been included (Supplementary Table S2).

176 Reporter constructs were transformed by electroporation into *Agrobacterium*  
177 *tumefaciens* GV3101 (pMP90). All sequences were verified by Sanger sequencing.



## 178 ***Agrobacterium*-Mediated Transient Transformation and PAMP treatment**

179 *Agrobacterium* strains carrying the constructs of interest were cultured in LB media  
180 containing kanamycin (50µg/mL), gentamicin (50µg/mL), rifampin (50µg/mL), and  
181 tetracycline (10ug/mL) for 24h. 3 mLs of culture were then pelleted and resuspended in  
182 infiltration media containing 10mM MES (pH 5.6), 10 mM MgCl<sub>2</sub>, and 150 µM  
183 acetosyringone. For coinfiltrations, separate strains harboring reporter and receptor  
184 constructs were combined at a final individual OD<sub>600</sub> = 0.3 for a final cumulative OD<sub>600</sub>  
185 =0.6. After 3h of incubation at room temperature (RT), the cell mixture was infiltrated  
186 into fully expanded leaves of 6-week-old *N. benthamiana* plants using a needleless  
187 syringe.

188 To assess induction of luminescence, transformed regions were infiltrated with peptide  
189 48 hours after *Agrobacterium* infiltration. Six hours after treatment, leaves were  
190 removed at the petiole and luminescence was immediately imaged using the Azure  
191 Imaging System with 8 seconds of exposure. Peptides were obtained from Genscript  
192 and diluted to specified concentrations in sterile autoclaved water.

## 193 **Quantification and Statistical Analysis**

194 Mean gray values of manually defined regions of interest were measured in ImageJ  
195 1.53k. Average signal intensity (ASI) was determined by subtracting the average mean  
196 gray value of the untransformed background from the mean gray values of the regions  
197 of interest. Negative ASI indicates lower mean gray value than background. One-way  
198 ANOVAs and post-hoc Tukey's t-tests were conducted using the agricolae (v1.3-5)  
199 package in R (v4.1.2) and summarized as compact letter displays. Differing letters

200 represent statistically significant differences ( $p < .05$ ) among pairwise comparisons.

201 Figure editing and layouts were completed in Inkscape.

## 202 **Phylogenetic Analysis**

203 Using the annotated coding sequence of *Niben101Scf06684g03003.1*, a BLASTN  
204 search was conducted against the *Vigna unguiculata* (v1.2), *Phaseolus vulgaris* (v2.1),  
205 and *Arabidopsis thaliana* (TAIR10) genomes (predicted cDNA sequences). *Arabidopsis*  
206 *thaliana* was included to identify potential characterized homologs, and the two legume  
207 species were included as representative legume species that natively encode INR. After  
208 aligning the top 70 hits, a maximum likelihood phylogenetic tree was generated using  
209 FastTree. A subset of this tree was then selected and realigned as translated amino  
210 acid sequences using MAFFT (Kato et al., 2019; Kuraku et al., 2013). A maximum  
211 likelihood tree was subsequently generated on the CIPRES web portal using RAXML-  
212 HPC2 on XSEDE (v8.2.12) (Miller et al., 2010; Stamatakis, 2014) with the automatic  
213 protein model assignment algorithm using maximum likelihood criterion and 100  
214 bootstrap replicates. The resulting phylogeny was rooted and visualized using MEGA11  
215 and edited in Inkscape.

216

## 217 **Results**

218

## 219 **Differentially Expressed Genes in Response to *Agrobacterium* and PTI activation**

220 Heterologous expression of PRRs in *N. benthamiana* allows for activation of PTI in  
221 response to cognate PAMPs, but transient expression requires introduction of  
222 *Agrobacterium*, a potentially independent source of PAMPs and activator of PTI  
223 responses. To characterize the transcriptional landscape of PTI induced by both  
224 *Agrobacterium* and individual PAMP treatment, we conducted transcriptomic analysis in  
225 plants stably expressing the *P. vulgaris* Inceptin Receptor (PvINR), an LRR-RLP which  
226 recognizes the peptide elicitor inceptin11 (In11) (Steinbrenner et al., 2020). Plants were  
227 infiltrated with *Agrobacterium* to mimic conditions during *Agrobacterium*-mediated  
228 transient transformation. After 24 hours, the *Agrobacterium*-infiltrated leaves were  
229 subsequently treated with water or In11 to induce immune signaling (Supplementary  
230 Fig. S1, “AH” or “AI”). Additionally, leaves previously mock infiltrated were infiltrated with  
231 water to account for effects of wounding during infiltration (Supplementary Fig. S1, “H”).  
232 Tissue was collected after 6 hours, and RNA sequencing was subsequently conducted  
233 to identify differentially expressed genes (DEGs) under each pair of conditions.

234 Compared to leaf tissue not previously infiltrated, infiltration with *Agrobacterium* affected  
235 expression of hundreds of genes (Fig. 1A, comparisons “AH vs H” and “AI vs H”,  
236 Supplementary Table S1). A total of 1425 upregulated and 938 downregulated genes  
237 were significantly altered by *Agrobacterium* infiltration. The majority of DEGs were  
238 observed in both In11 and water treated tissue.

239 To identify useful markers of PTI activation in the context of *Agrobacterium*, we next  
240 compared gene expression in *Agrobacterium*-infiltrated leaf tissue in the presence or

241 absence of In11 peptide (AI vs AH). Only one gene was significantly differentially  
242 expressed (Supplementary Table S1, column “adj. p”). Since In11 treatment previously  
243 activated measurable early immune phenotypes (Steinbrenner et al., 2020), namely  
244 induced ROS and ethylene production, in identical experimental conditions, we  
245 reasoned that transcriptional changes at this timepoint may occur below the threshold  
246 for statistical significance. We therefore performed a separate analysis filtering for  
247 genes with  $p < 0.05$  differential expression by standard Wald test but without correction  
248 for multiple comparisons (Supplementary Fig. S1B, Supplementary Table S1, column  
249 “p-value”). With this relaxed threshold 91 genes were characterized as upregulated by  
250 the addition of In11 (Supplementary Fig. S1). Interestingly, In11-upregulated genes  
251 overlapped with both *Agrobacterium*-upregulated (Supplementary Fig. S1B) and  
252 downregulated genes (Supplementary Fig. S1C), suggesting complex regulation of  
253 specific *N. benthamiana* PTI outputs.

254 We further filtered candidate PTI marker genes based on broad responsiveness to both  
255 *Agrobacterium* and In11. Nine genes showed higher *Agrobacterium* or In11 induced  
256 expression in all three comparisons (Fig. 1C, Supplementary Fig. S1B), suggesting a  
257 large dynamic range of gene expression able to be activated by both *Agrobacterium*  
258 PAMPs and by the addition of the separate individual PAMP, In11. To determine more  
259 confidently which of these genes are induced by In11 treatment, we conducted qRT-  
260 PCR analysis probing differences in expression of each of the candidate marker genes  
261 six hours after water and In11 treatment. We found that four genes showed significant  
262 induction after treatment with In11 in tissue transiently expressing *PvINR*, but not in  
263 tissue infiltrated with an empty vector strain: *Niben101Scf08566g08014*,

264 *Niben101Scf04592g00020*, *Niben101Scf06684g03003*, *Niben101Scf04652g00027* (Fig.  
265 2). We conclude that these four genes serve as markers of INR-mediated responses to  
266 In11 in *Nicotiana benthamiana* after transient PRR expression. In summary, while the  
267 transcriptional effects of an additional PAMP, In11, 24 hours after Agrobacterium  
268 infiltration are subtle, candidate genes were observed with Agrobacterium and PAMP-  
269 inducible behavior consistent with broadly responsive marker genes.

### 270 **An FBP Luminescence Reporter to Quantify Innate Immune Activation by PTI**

271 To test whether the promoter regions of these genes could function in In11-inducible  
272 reporters, we generated promoter fusion constructs with promoter regions of the  
273 endogenous *N. benthamiana* marker genes driving expression of the fungal luciferase  
274 (LUZ). Original FBP constructs contain five genes of the pathway for both LUZ and  
275 substrate biosynthesis enzymes (Khakhar et al., 2020). We first generated an adaptable  
276 acceptor construct allowing MoClo-compatible cloning of promoters to drive LUZ  
277 expression (Supplementary Fig. 2A). This vector, *pFBP\_promoter\_acceptor*, is available  
278 on Addgene (confirmation pending). Using this construct, we replaced the original  
279 constitutive CaMV35S promoter originally driving LUZ with promoter regions of genes of  
280 Fig. 2. Of the two constructs we successfully generated, only a fusion driven by the  
281 promoter region of *Niben101Scf06684g03003* showed induction of luminescence upon  
282 In11 treatment in a PvINR-dependent manner (Fig. 3A, Supplementary Fig. S3).  
283 *Niben101Scf06684g03003* is a homolog of the *A. thaliana* Class III lysozyme *LYS1*  
284 (Supplementary Fig. S4) (X. Liu et al., 2014). We therefore termed this construct  
285 *pFBP\_NbLYS1::LUZ* (hereafter *pLYS1::LUZ*). Importantly, infiltration damage during  
286 treatment with H<sub>2</sub>O does not result in high background luminescence and is instead

287 comparable with tissue not infiltrated with the reporter (Supplementary Fig. S5A),  
288 making luminescence upon induction with In11 easily detectable.

289 Luminescence induced by the *pLYS1::LUZ* construct was markedly lower than a  
290 construct using the CaMV35S promoter to drive LUZ expression (Supplementary Fig.  
291 S4B). However, duplication of promoters has been shown to effectively increase  
292 strength of expression (Kay et al., 1987). To enhance the strength of reporter  
293 expression and observable luminescence, we also constructed *pFBP\_2xNbLYS1::LUZ*  
294 (hereafter *p2xLYS1::LUZ*), a double promoter region construct where two copies of the  
295 *NbLYS1* promoter were arranged adjacently and used to drive expression of luciferase  
296 treatment (Supplementary Fig. S5B). When coexpressed alongside *PvINR*, the  
297 *pLYS1::LUZ* single copy construct did not show a statistically significant difference in  
298 luminescence between water and In11 treatment, while the *p2xLYS1::LUZ* double copy  
299 construct did show a significant difference between the water and In11 treatments (Fig.  
300 3A). We therefore elected to proceed using the *p2xLYS1::LUZ* FBP construct as a  
301 reporter for all subsequent experiments.

302 Different assays for immune receptor function show varying degrees of sensitivity to low  
303 elicitor concentrations (Mott et al., 2018). To determine the sensitivity of the FBP  
304 reporter assay to In11 treatment, we coexpressed the *p2xLYS1::LUZ* reporter and  
305 *p35s::PvINR* and conducted a dose-response experiment using increasing  
306 concentrations of In11. We observed statistically significant differences in luminescence  
307 between water and In11 treatments above 500 pM (Fig. 3B). This falls within the range  
308 of reported In11 concentrations that are present in the oral secretions of caterpillars

309 during herbivory (Schmelz et al., 2006). As a result, the *p2xLYS1::LUZ* is a robust  
310 reporter of immune activation by biologically relevant elicitor concentrations.

311 Besides INR, other heterologously expressed PRRs are capable of conferring PTI  
312 immune signaling in *N. benthamiana* (Albert et al., 2015; Steinbrenner et al., 2020; L.  
313 Zhang et al., 2021). Furthermore, flg22 treatment induces expression of the *A. thaliana*  
314 *LYS1* homolog (X. Liu et al., 2014). To test whether the *p2xLYS1::LUZ* construct serves  
315 as a reporter of PRR activity more broadly, we also tested reporter inducibility by two  
316 cell surface PRRs from *A. thaliana*: EFR and RLP23. We observed background  
317 induction of luminescence in leaf tissue expressing EFR when treated with elf18 (Fig.  
318 4C), potentially due to background induction of EFR by *Agrobacterium*. elf18  
319 nonetheless robustly induces luminescence relative to mock treatment. We also  
320 observed induction of luminescence in leaf tissue expressing RLP23 when treated with  
321 nlp20 (Fig. 4D). Importantly, induction of luminescence is only observed in regions of  
322 interest where the cognate receptor-elicitor pair is present. Together, these data support  
323 the utility of the *p2xLYS1::LUZ* construct as a robust reporter of specific PRR-elicitor  
324 interactions.

### 325 **SOBIR1 is necessary for INR-mediated Induction of Bioluminescence by Inceptin**

326 Characterized LRR-RLPs are known to require the adaptor receptor-kinase  
327 SUPPRESSOR OF BIR1-1 (SOBIR1) to initiate downstream signaling (Liebrand et al.,  
328 2013; Albert et al., 2015). Although SOBIR1 has been shown to associate with INR in  
329 *Nicotiana benthamiana*, it is not yet known if SOBIR1 is necessary for immune signaling  
330 by PvINR (Steinbrenner et al., 2020). To determine whether PvINR requires SOBIR1

331 and whether the *p2xLYS1::LUZ* reflects downstream immune signaling pathways, we  
332 conducted reporter assays in *N. benthamiana sobir1* knockout plants, which previously  
333 showed compromised function of the tomato LRR-RLP Cf4 (Huang et al., 2021).  
334 Induction of luminescence by In11 treatment is absent in *sobir1* mutant plants and  
335 restored when either *A. thaliana SOBIR1* or *P. vulgaris SOBIR1* are coexpressed with  
336 *PvINR*. (Fig. 5). Thus, reporter activation is subject to similar requirements for LRR-  
337 RLP function as well-characterized PTI responses. This suggests that the  
338 *p2xLYS1::LUZ* construct serves as a useful tool not only for studying receptor-elicitor  
339 interactions but also downstream interactions important for immune activation and  
340 signaling.

341

## 342 **Discussion**

343

344 We describe here a genetically encoded reporter responsive to heterologously  
345 expressed PRRs in *N. benthamiana*. The *p2xLYS1::LUZ* reporter demonstrates robust  
346 PAMP sensitivity and does not require addition of exogenous enzyme substrate.  
347 Therefore, this reporter assay may be a useful tool for assessing immune activation by  
348 a number of diverse PRRs, including both receptor-like kinases and receptor-like  
349 proteins.

350 To develop this reporter, we first characterized the transcriptional modifications that  
351 occur in response to both *Agrobacterium* and elicitor perception by a heterologously  
352 expressed LRR-RLP. LRR-RLPs warrant further structural and functional



353 characterization, as they constitute a key class of PRRs involved in activating plant  
354 innate immune responses (Jamieson et al., 2018; Albert et al., 2020; Steinbrenner,  
355 2020). LRR-RLPs also include the first known receptor-ligand pair involved in defense  
356 against a chewing herbivore (Steinbrenner et al., 2020). However, the specific  
357 molecular interactions required for immune signaling by LRR-RLPs in plants remain  
358 only partially understood, in part because no solved crystal structures of LRR-RLPs  
359 have been reported. Although characterized LRR-RLPs require SUPPRESSOR OF  
360 BIR1-1 (SOBIR1) and SOMATIC EMBRYOGENESIS RECEPTOR KINASEs (SERKs)  
361 to activate immune signaling, the mechanisms underlying ligand binding and coreceptor  
362 association are unclear (van der Burgh et al., 2019). As a result, we tailored our reporter  
363 system toward heterologously expressed LRR-RLPs to aid in gathering deeper insights  
364 into this important and incompletely understood group of plant cell surface immune  
365 receptors. However, we also observed induction of luminescence in response to the  
366 bacterial elicitor elf18 in tissue expressing *A. thaliana* EFR, a receptor-like kinase (RLK)  
367 (Zipfel et al., 2006). As a result, this reporter could be useful for studying RLK signaling.  
368 Additionally, recent studies describing the overlap between PTI and ETI signaling  
369 suggest common signaling components (Ngou et al., 2021; Pruitt et al., 2021). As a  
370 result, there is a possibility this reporter could serve to study intracellular immune  
371 receptors and may be particularly useful when these receptors do not produce  
372 hypersensitive responses.

373 Unsurprisingly, our transcriptomic analysis revealed that *Agrobacterium* treatment alone  
374 resulted in large changes in gene expression. This demonstrates that *Agrobacterium*  
375 strongly induces innate immunity in *N. benthamiana*, likely through recognition of

376 *Agrobacterium* PAMPs, resulting in large-scale transcriptional changes. Therefore, it is  
377 important to consider the role of *Agrobacterium* PAMPs in activating immunity.  
378 Interestingly, many genes that showed upregulation in response to In11 treatment were  
379 genes that were downregulated by *Agrobacterium* (Fig S1B-C). While likely due to  
380 timescales of *Agrobacterium* inoculation (24 hpi) versus In11 treatment (6 hpi), it is also  
381 possible that perception of *Agrobacterium* PAMPs by *N. benthamiana* is antagonized by  
382 simultaneous activation of immunity by the herbivore-associated In11 elicitor, a potential  
383 result of signaling conflict between SA and JA signaling (Li et al., 2019). *Agrobacterium*  
384 may activate biotroph-related immunity, whereas INR may activate necrotroph-related  
385 immunity through pathways downstream of SOBIR1. Because of the complex nature of  
386 these factors, we selected genes that showed upregulation in response to  
387 *Agrobacterium* that was further amplified by In11 treatment to identify a generic marker  
388 of immune activation by specific elicitor receptor interactions.

389 Although we identified four marker candidates, only one showed induction of  
390 luminescence in response to elicitor treatment (Fig. 3). We were either unable to clone  
391 the respective promoter region (*Niben101Scf04592g00020*, *Niben101Scf04652g00027*)  
392 or observed no luminescence in response to In11 treatment compared to water  
393 treatment (*Niben101Scf08566g08014*) (Supplementary Fig. S2). Although protocols  
394 exist to amplify difficult templates such as AT or GC-rich sequences (Dhatterwal et al.,  
395 2017; Sahdev et al., 2007), the complex nature of the *N. benthamiana* genome poses  
396 technical challenges in amplifying already evasive promoter regions (Bombarely et al.,  
397 2012). Furthermore, it is possible that promoter terminator incompatibility occurred  
398 between candidate promoter regions resulting in silencing of *LUZ* (P.-H. Wang et al.,

399 2020). Finally, it is possible that we failed to include the necessary cis-regulatory  
400 elements of the promoter region, as we decided on a somewhat arbitrary cutoff of 1.5 kb  
401 preceding the start codon of the gene. Trans-regulatory elements may also be  
402 necessary to mediate observed changes in gene expression in response to In11  
403 treatment. As a result, improved understanding of plant transcriptional regulatory  
404 elements will facilitate efforts to identify and utilize additional highly responsive  
405 promoters under a variety of biotic stress conditions as tools to study plant immune  
406 responses.

407 The *pFBP\_promoter\_acceptor* construct is now publicly available to screen other  
408 candidate promoters through simple MoClo ligation of a promoter of interest. However,  
409 several considerations should be taken regarding the use of the FBP reporter. Unlike  
410 firefly luciferase, which is known to have a short half-life in the presence of luciferin (Van  
411 Leeuwen et al., 2000), it is suggested that the stability of fungal luciferase is more  
412 suitable for measuring changes over hours, limiting its utility on finer time scales  
413 (Khakhar et al., 2020). Induction of luminescence should as a result be viewed as a  
414 cumulative representation of reporter activity, rather than instantaneous measure of  
415 gene expression. Furthermore, production of fungal luciferin depends on availability of  
416 caffeic acid, causing luciferin availability to not be completely uniform across all plant  
417 tissues, and sustained periods of fungal luciferase activity to possibly deplete luciferin  
418 stores. Although these limitations remain largely negligible for the purpose of assessing  
419 specific receptor-elicitor interactions, they should be considered in situations where  
420 temporal and spatial aspects are of importance.

421 This system represents a potentially high-throughput and sensitive reporter for  
422 assessing immune activation by heterologously expressed PRRs in *N. benthamiana*.  
423 Although other systems retain power by being more sensitive to subtle immune  
424 phenotypes and usefulness in characterizing endogenous immune signaling processes  
425 in non-model organisms, the sensitivity, robustness, and ease of the FBP reporter  
426 system make it useful for understanding cell surface receptor function in *N.*  
427 *benthamiana*. As a result, this reporter represents a potentially valuable addition to the  
428 plant immune biology toolkit, especially for large scale studies aimed at illuminating the  
429 structure and function of cell surface immune receptors from diverse species.

#### 430 **Acknowledgements**

431 We thank members of the Steinbrenner, Imaizumi and Nemhauser labs at UW Biology  
432 for helpful discussion and comments. This work was supported by NSF grant IOS-  
433 2139986 and the UW Mary Gates Endowment for Students.

434

#### 435 **Author Contributions**

436 A.D.S. conducted the transcriptomic analysis. A.G.K.G. conducted subsequent  
437 experiments. A.D.S. and A.G.K.G wrote the manuscript.

438 **Materials Availability**

439 Transcriptomic data are available in NCBI SRA (BioProject number pending). The  
440 *pFBP\_promoter\_acceptor* and *pFBP\_2xNbLYS1::LUZ* constructs are available at  
441 Addgene (confirmation pending).

442 **References**

443  
444  
445 Adachi, H., Contreras, M. P., Harant, A., Wu, C., Derevnina, L., Sakai, T., Duggan, C.,  
446 Moratto, E., Bozkurt, T. O., Maqbool, A., Win, J., & Kamoun, S. (2019). An N-  
447 terminal motif in NLR immune receptors is functionally conserved across distantly  
448 related plant species. *ELife*, *8*, e49956. <https://doi.org/10.7554/eLife.49956>  
449 Albert, I., Böhm, H., Albert, M., Feiler, C. E., Imkampe, J., Wallmeroth, N., Brancato, C.,  
450 Raaymakers, T. M., Oome, S., Zhang, H., Krol, E., Grefen, C., Gust, A. A., Chai,  
451 J., Hedrich, R., Van den Ackerveken, G., & Nürnberger, T. (2015). An RLP23–  
452 SOBIR1–BAK1 complex mediates NLP-triggered immunity. *Nature Plants*, *1*(10),  
453 1–9. <https://doi.org/10.1038/nplants.2015.140>  
454 Albert, I., Hua, C., Nürnberger, T., Pruitt, R. N., & Zhang, L. (2020). Surface Sensor  
455 Systems in Plant Immunity. *Plant Physiology*, *182*(4), 1582–1596.  
456 <https://doi.org/10.1104/pp.19.01299>  
457 Aldon, D., Mbengue, M., Mazars, C., & Galaud, J.-P. (2018). Calcium Signalling in Plant  
458 Biotic Interactions. *International Journal of Molecular Sciences*, *19*(3), 665.  
459 <https://doi.org/10.3390/ijms19030665>  
460 Anders, S., Pyl, P. T., & Huber, W. (2015). HTSeq—A Python framework to work with  
461 high-throughput sequencing data. *Bioinformatics*, *31*(2), 166–169.

- 462 <https://doi.org/10.1093/bioinformatics/btu638>
- 463 Berens, M. L., Berry, H. M., Mine, A., Argueso, C. T., & Tsuda, K. (2017). Evolution of  
464 Hormone Signaling Networks in Plant Defense. *Annual Review of*  
465 *Phytopathology*, 55(1), 401–425. [https://doi.org/10.1146/annurev-phyto-080516-](https://doi.org/10.1146/annurev-phyto-080516-035544)  
466 035544
- 467 Bombarely, A., Rosli, H. G., Vrebalov, J., Moffett, P., Mueller, L. A., & Martin, G. B.  
468 (2012). A Draft Genome Sequence of *Nicotiana benthamiana* to Enhance  
469 Molecular Plant-Microbe Biology Research. *Molecular Plant-Microbe Interactions*,  
470 25(12), 1523–1530. <https://doi.org/10.1094/MPMI-06-12-0148-TA>
- 471 Boutrot, F., & Zipfel, C. (2017). Function, Discovery, and Exploitation of Plant Pattern  
472 Recognition Receptors for Broad-Spectrum Disease Resistance. *Annual Review*  
473 *of Phytopathology*, 55, 257–286. [https://doi.org/10.1146/annurev-phyto-080614-](https://doi.org/10.1146/annurev-phyto-080614-120106)  
474 120106
- 475 Broekgaarden, C., Caarls, L., Vos, I. A., Pieterse, C. M. J., & Van Wees, S. C. M.  
476 (2015). Ethylene: Traffic Controller on Hormonal Crossroads to Defense. *Plant*  
477 *Physiology*, 169(4), 2371–2379. <https://doi.org/10.1104/pp.15.01020>
- 478 Buscaill, P., Sanguankiatichai, N., Lee, Y. J., Kourelis, J., Preston, G., & van der Hoorn,  
479 R. A. L. (2021). Agromonas: A rapid disease assay for *Pseudomonas syringae*  
480 growth in agroinfiltrated leaves. *The Plant Journal*, 105(3), 831–840.  
481 <https://doi.org/10.1111/tpj.15056>
- 482 de Jonge, R., Peter van Esse, H., Maruthachalam, K., Bolton, M. D., Santhanam, P.,  
483 Saber, M. K., Zhang, Z., Usami, T., Lievens, B., Subbarao, K. V., & Thomma, B.  
484 P. H. J. (2012). Tomato immune receptor Ve1 recognizes effector of multiple

- 485 fungal pathogens uncovered by genome and RNA sequencing. *Proceedings of*  
486 *the National Academy of Sciences*, 109(13), 5110–5115.  
487 <https://doi.org/10.1073/pnas.1119623109>
- 488 DeBlasio, S. L., Sylvester, A. W., & Jackson, D. (2010). Illuminating plant biology: Using  
489 fluorescent proteins for high-throughput analysis of protein localization and  
490 function in plants. *Briefings in Functional Genomics*, 9(2), 129–138.  
491 <https://doi.org/10.1093/bfgp/elp060>
- 492 DeFalco, T. A., Toyota, M., Phan, V., Karia, P., Moeder, W., Gilroy, S., & Yoshioka, K.  
493 (2017). Using GCaMP3 to Study Ca<sup>2+</sup> Signaling in Nicotiana Species. *Plant and*  
494 *Cell Physiology*, 58(7), 1173–1184. <https://doi.org/10.1093/pcp/pcx053>
- 495 Denoux, C., Galletti, R., Mammarella, N., Gopalan, S., Werck, D., De Lorenzo, G.,  
496 Ferrari, S., Ausubel, F. M., & Dewdney, J. (2008). Activation of Defense  
497 Response Pathways by OGs and Flg22 Elicitors in Arabidopsis Seedlings.  
498 *Molecular Plant*, 1(3), 423–445. <https://doi.org/10.1093/mp/ssn019>
- 499 Dhatteval, P., Mehrotra, S., & Mehrotra, R. (2017). Optimization of PCR conditions for  
500 amplifying an AT-rich amino acid transporter promoter sequence with high  
501 number of tandem repeats from Arabidopsis thaliana. *BMC Research Notes*, 10,  
502 638. <https://doi.org/10.1186/s13104-017-2982-1>
- 503 Earley, K. W., Haag, J. R., Pontes, O., Opper, K., Juehne, T., Song, K., & Pikaard, C. S.  
504 (2006). Gateway-compatible vectors for plant functional genomics and  
505 proteomics. *The Plant Journal*, 45(4), 616–629. [https://doi.org/10.1111/j.1365-](https://doi.org/10.1111/j.1365-313X.2005.02617.x)  
506 [313X.2005.02617.x](https://doi.org/10.1111/j.1365-313X.2005.02617.x)
- 507 Engler, C., Youles, M., Gruetzner, R., Ehnert, T.-M., Werner, S., Jones, J. D. G., Patron,

- 508 N. J., & Marillonnet, S. (2014). A Golden Gate Modular Cloning Toolbox for  
509 Plants. *ACS Synthetic Biology*, 3(11), 839–843.  
510 <https://doi.org/10.1021/sb4001504>
- 511 Furuhata, Y., Sakai, A., Murakami, T., Nagasaki, A., & Kato, Y. (2020). Bioluminescent  
512 imaging of *Arabidopsis thaliana* using an enhanced Nano-lantern luminescence  
513 reporter system. *PLoS ONE*, 15(1), e0227477.  
514 <https://doi.org/10.1371/journal.pone.0227477>
- 515 Goodin, M. M., Zaitlin, D., Naidu, R. A., & Lommel, S. A. (2008). *Nicotiana*  
516 *benthamiana*: Its History and Future as a Model for Plant–Pathogen Interactions.  
517 *Molecular Plant-Microbe Interactions*, 21(8), 1015–1026.  
518 <https://doi.org/10.1094/MPMI-21-8-1015>
- 519 Haugwitz, M., Nourzaie, O., Garachtchenko, T., Hu, L., Gandlur, S., Olsen, C., Farmer,  
520 A., Chaga, G., & Sagawa, H. (2008). Multiplexing Bioluminescent and  
521 Fluorescent Reporters to Monitor Live Cells. *Current Chemical Genomics*, 1, 11–  
522 19. <https://doi.org/10.2174/1875397300801010011>
- 523 He, Y., Zhang, T., Sun, H., Zhan, H., & Zhao, Y. (2020). A reporter for noninvasively  
524 monitoring gene expression and plant transformation. *Horticulture Research*,  
525 7(1), 1–6. <https://doi.org/10.1038/s41438-020-00390-1>
- 526 Huang, W. R. H., Schol, C., Villanueva, S. L., Heidstra, R., & Joosten, M. H. A. J.  
527 (2021). Knocking out SOBIR1 in *Nicotiana benthamiana* abolishes functionality of  
528 transgenic receptor-like protein Cf-4. *Plant Physiology*, 185(2), 290–294.  
529 <https://doi.org/10.1093/plphys/kiab047>
- 530 Jamieson, P. A., Shan, L., & He, P. (2018). Plant cell surface molecular cypher:



531 Receptor-like proteins and their roles in immunity and development. *Plant*  
532 *Science*, 274, 242–251. <https://doi.org/10.1016/j.plantsci.2018.05.030>

533 Jutras, P. V., Soldan, R., Dodds, I., Schuster, M., Preston, G. M., & van der Hoorn, R.  
534 A. L. (2021). AgroLux: Bioluminescent Agrobacterium to improve molecular  
535 pharming and study plant immunity. *The Plant Journal*, 108(2), 600–612.  
536 <https://doi.org/10.1111/tpj.15454>

537 Katoh, K., Rozewicki, J., & Yamada, K. D. (2019). MAFFT online service: Multiple  
538 sequence alignment, interactive sequence choice and visualization. *Briefings in*  
539 *Bioinformatics*, 20(4), 1160–1166. <https://doi.org/10.1093/bib/bbx108>

540 Kay, R., Chan, A., Daly, M., & McPherson, J. (1987). Duplication of CaMV 35S  
541 Promoter Sequences Creates a Strong Enhancer for Plant Genes. *Science*,  
542 236(4806), 1299–1302.

543 Khakhar, A., Starker, C. G., Chamness, J. C., Lee, N., Stokke, S., Wang, C., Swanson,  
544 R., Rizvi, F., Imaizumi, T., & Voytas, D. F. (2020). Building customizable auto-  
545 luminescent luciferase-based reporters in plants. *ELife*, 9, e52786.  
546 <https://doi.org/10.7554/eLife.52786>

547 Kim, D., Paggi, J. M., Park, C., Bennett, C., & Salzberg, S. L. (2019). Graph-based  
548 genome alignment and genotyping with HISAT2 and HISAT-genotype. *Nature*  
549 *Biotechnology* 37(8), 907–915. <https://doi.org/10.1038/s41587-019-0201-4>

550 Kuraku, S., Zmasek, C. M., Nishimura, O., & Katoh, K. (2013). ALeaves facilitates on-  
551 demand exploration of metazoan gene family trees on MAFFT sequence  
552 alignment server with enhanced interactivity. *Nucleic Acids Research*, 41(W1),  
553 W22–W28. <https://doi.org/10.1093/nar/gkt389>

- 554 Li, N., Han, X., Feng, D., Yuan, D., & Huang, L.-J. (2019). Signaling Crosstalk between  
555 Salicylic Acid and Ethylene/Jasmonate in Plant Defense: Do We Understand  
556 What They Are Whispering? *International Journal of Molecular Sciences*, *20*(3),  
557 671. <https://doi.org/10.3390/ijms20030671>
- 558 Liebrand, T. W. H., van den Berg, G. C. M., Zhang, Z., Smit, P., Cordewener, J. H. G.,  
559 America, A. H. P., Sklenar, J., Jones, A. M. E., Tameling, W. I. L., Robatzek, S.,  
560 Thomma, B. P. H. J., & Joosten, M. H. A. J. (2013). Receptor-like kinase  
561 SOBIR1/EVR interacts with receptor-like proteins in plant immunity against  
562 fungal infection. *Proceedings of the National Academy of Sciences*, *110*(24),  
563 10010–10015. <https://doi.org/10.1073/pnas.1220015110>
- 564 Liu, D., Shi, L., Han, C., Yu, J., Li, D., & Zhang, Y. (2012). Validation of Reference  
565 Genes for Gene Expression Studies in Virus-Infected *Nicotiana benthamiana*  
566 Using Quantitative Real-Time PCR. *PLoS ONE*, *7*(9), e46451.  
567 <https://doi.org/10.1371/journal.pone.0046451>
- 568 Liu, X., Grabherr, H. M., Willmann, R., Kolb, D., Brunner, F., Bertsche, U., Kühner, D.,  
569 Franz-Wachtel, M., Amin, B., Felix, G., Ongena, M., Nürnberger, T., & Gust, A. A.  
570 (2014). Host-induced bacterial cell wall decomposition mediates pattern-triggered  
571 immunity in *Arabidopsis*. *ELife*, *3*, e01990. <https://doi.org/10.7554/eLife.01990>
- 572 Love, M. I., Huber, W., & Anders, S. (2014). Moderated estimation of fold change and  
573 dispersion for RNA-seq data with DESeq2. *Genome Biology*, *15*(12), 550.  
574 <https://doi.org/10.1186/s13059-014-0550-8>
- 575 Melotto, M., Zhang, L., Oblessuc, P. R., & He, S. Y. (2017). Stomatal Defense a Decade  
576 Later. *Plant Physiology*, *174*(2), 561–571. <https://doi.org/10.1104/pp.16.01853>

- 577 Miller, M. A., Pfeiffer, W., & Schwartz, T. (2010). Creating the CIPRES Science  
578 Gateway for inference of large phylogenetic trees. *Proceedings of the Gateway*  
579 *Computing Environments Workshop (GCE)*, 1–8.  
580 <https://doi.org/10.1109/GCE.2010.5676129>
- 581 Mitiouchkina, T., Mishin, A. S., Somermeyer, L. G., Markina, N. M., Chepurnyh, T. V.,  
582 Guglya, E. B., Karataeva, T. A., Palkina, K. A., Shakhova, E. S., Fakhranurova,  
583 L. I., Chekova, S. V., Tsarkova, A. S., Golubev, Y. V., Negrebetsky, V. V.,  
584 Dolgushin, S. A., Shalaev, P. V., Shlykov, D., Melnik, O. A., Shipunova, V. O., ...  
585 Sarkisyan, K. S. (2020). Plants with genetically encoded autoluminescence.  
586 *Nature Biotechnology*, 38(8), 944–946. [https://doi.org/10.1038/s41587-020-0500-](https://doi.org/10.1038/s41587-020-0500-9)  
587 9
- 588 Mott, G. A., Desveaux, D., & Guttman, D. S. (2018). A High-Sensitivity, Microtiter-Based  
589 Plate Assay for Plant Pattern-Triggered Immunity. *Molecular Plant-Microbe*  
590 *Interactions*, 31(5), 499–504. <https://doi.org/10.1094/MPMI-11-17-0279-TA>
- 591 Navarro, L., Zipfel, C., Rowland, O., Keller, I., Robatzek, S., Boller, T., & Jones, J. D. G.  
592 (2004). The transcriptional innate immune response to flg22. Interplay and  
593 overlap with Avr gene-dependent defense responses and bacterial pathogenesis.  
594 *Plant Physiology*, 135(2), 1113–1128. <https://doi.org/10.1104/pp.103.036749>
- 595 Ngou, B. P. M., Ahn, H.-K., Ding, P., & Jones, J. D. G. (2021). Mutual potentiation of  
596 plant immunity by cell-surface and intracellular receptors. *Nature*, 592(7852),  
597 110–115. <https://doi.org/10.1038/s41586-021-03315-7>
- 598 Nguyen, H. P., Chakravarthy, S., Velásquez, A. C., McLane, H. L., Zeng, L.,  
599 Nakayashiki, H., Park, D.-H., Collmer, A., & Martin, G. B. (2010). Methods to

600 study PAMP-triggered immunity using tomato and *Nicotiana benthamiana*.  
601 *Molecular Plant-Microbe Interactions*, 23(8), 991–999.  
602 <https://doi.org/10.1094/MPMI-23-8-0991>

603 Pruitt, R. N., Locci, F., Wanke, F., Zhang, L., Saile, S. C., Joe, A., Karelina, D., Hua, C.,  
604 Fröhlich, K., Wan, W.-L., Hu, M., Rao, S., Stolze, S. C., Harzen, A., Gust, A. A.,  
605 Harter, K., Joosten, M. H. A. J., Thomma, B. P. H. J., Zhou, J.-M., ... Nürnberger,  
606 T. (2021). The EDS1–PAD4–ADR1 node mediates Arabidopsis pattern-triggered  
607 immunity. *Nature*, 598(7881), 495–499. [https://doi.org/10.1038/s41586-021-](https://doi.org/10.1038/s41586-021-03829-0)  
608 03829-0

609 Qi, J., Wang, J., Gong, Z., & Zhou, J.-M. (2017). Apoplastic ROS signaling in plant  
610 immunity. *Current Opinion in Plant Biology*, 38, 92–100.  
611 <https://doi.org/10.1016/j.pbi.2017.04.022>

612 Sahdev, S., Saini, S., Tiwari, P., Saxena, S., & Singh Saini, K. (2007). Amplification of  
613 GC-rich genes by following a combination strategy of primer design, enhancers  
614 and modified PCR cycle conditions. *Molecular and Cellular Probes*, 21(4), 303–  
615 307. <https://doi.org/10.1016/j.mcp.2007.03.004>

616 Schmelz, E. A., Carroll, M. J., LeClere, S., Phipps, S. M., Meredith, J., Chourey, P. S.,  
617 Alborn, H. T., & Teal, P. E. A. (2006). Fragments of ATP synthase mediate plant  
618 perception of insect attack. *Proceedings of the National Academy of Sciences*,  
619 103(23), 8894–8899. <https://doi.org/10.1073/pnas.0602328103>

620 Segretin, M. E., Pais, M., Franceschetti, M., Chaparro-Garcia, A., Bos, J. I. B., Banfield,  
621 M. J., & Kamoun, S. (2014). Single Amino Acid Mutations in the Potato Immune  
622 Receptor R3a Expand Response to Phytophthora Effectors. *Molecular Plant-*

- 623 *Microbe Interactions*, 27(7), 624–637. <https://doi.org/10.1094/MPMI-02-14-0040->
- 624 R
- 625 Stamatakis, A. (2014). RAxML version 8: A tool for phylogenetic analysis and post-
- 626 analysis of large phylogenies. *Bioinformatics*, 30(9), 1312–1313.
- 627 <https://doi.org/10.1093/bioinformatics/btu033>
- 628 Steinbrenner, A. D. (2020). The evolving landscape of cell surface pattern recognition
- 629 across plant immune networks. *Current Opinion in Plant Biology*, 56, 135–146.
- 630 <https://doi.org/10.1016/j.pbi.2020.05.001>
- 631 Steinbrenner, A. D., Goritschnig, S., & Staskawicz, B. J. (2015). Recognition and
- 632 Activation Domains Contribute to Allele-Specific Responses of an Arabidopsis
- 633 NLR Receptor to an Oomycete Effector Protein. *PLOS Pathogens*, 11(2),
- 634 e1004665. <https://doi.org/10.1371/journal.ppat.1004665>
- 635 Steinbrenner, A. D., Muñoz-Amatriaín, M., Chaparro, A. F., Aguilar-Venegas, J. M., Lo,
- 636 S., Okuda, S., Glauser, G., Dongiovanni, J., Shi, D., Hall, M., Crubaugh, D.,
- 637 Holton, N., Zipfel, C., Abagyan, R., Turlings, T. C. J., Close, T. J., Huffaker, A., &
- 638 Schmelz, E. A. (2020). A receptor-like protein mediates plant immune responses
- 639 to herbivore-associated molecular patterns. *Proceedings of the National*
- 640 *Academy of Sciences*, 117(49), 31510–31518.
- 641 <https://doi.org/10.1073/pnas.2018415117>
- 642 Thorne, N., Inglese, J., & Auld, D. S. (2010). Illuminating insights into firefly luciferase
- 643 and other bioluminescent reporters used in chemical biology. *Chemistry &*
- 644 *Biology*, 17(6), 646–657. <https://doi.org/10.1016/j.chembiol.2010.05.012>
- 645 Toyota, M., Spencer, D., Sawai-Toyota, S., Jiaqi, W., Zhang, T., Koo, A. J., Howe, G.

- 646 A., & Gilroy, S. (2018). Glutamate triggers long-distance, calcium-based plant  
647 defense signaling. *Science*, 361(6407), 1112–1115.  
648 <https://doi.org/10.1126/science.aat7744>
- 649 van der Burgh, A. M., Postma, J., Robatzek, S., & Joosten, M. H. A. J. (2019). Kinase  
650 activity of SOBIR1 and BAK1 is required for immune signalling. *Molecular Plant  
651 Pathology*, 20(3), 410–422. <https://doi.org/10.1111/mpp.12767>
- 652 Van Leeuwen, W., Hagendoorn, M. J. M., Ruttink, T., Van Poecke, R., Van Der Plas, L.  
653 H. W., & Van Der Krol, A. R. (2000). The use of the luciferase reporter system for  
654 in planta gene expression studies. *Plant Molecular Biology Reporter*, 18(2), 143–  
655 144. <https://doi.org/10.1007/BF02824024>
- 656 Wang, P.-H., Kumar, S., Zeng, J., McEwan, R., Wright, T. R., & Gupta, M. (2020).  
657 Transcription Terminator-Mediated Enhancement in Transgene Expression in  
658 Maize: Preponderance of the AUGAAU Motif Overlapping With Poly(A) Signals.  
659 *Frontiers in Plant Science*, 11.  
660 <https://www.frontiersin.org/article/10.3389/fpls.2020.570778>
- 661 Wang, Y., Li, X., Fan, B., Zhu, C., & Chen, Z. (2021). Regulation and Function of  
662 Defense-Related Callose Deposition in Plants. *International Journal of Molecular  
663 Sciences*, 22(5), 2393. <https://doi.org/10.3390/ijms22052393>
- 664 Zhang, L., Hua, C., Pruitt, R. N., Qin, S., Wang, L., Albert, I., Albert, M., van Kan, J. A.  
665 L., & Nürnberger, T. (2021). Distinct immune sensor systems for fungal  
666 endopolygalacturonases in closely related Brassicaceae. *Nature Plants*, 7(9),  
667 1254–1263. <https://doi.org/10.1038/s41477-021-00982-2>
- 668 Zhang, L., Kars, I., Essenstam, B., Liebrand, T. W. H., Wagemakers, L., Elberse, J.,

669 Tagkalaki, P., Tjoitang, D., Ackerveken, G. van den, & Kan, J. A. L. van. (2014).  
670 Fungal Endopolygalacturonases Are Recognized as Microbe-Associated  
671 Molecular Patterns by the Arabidopsis Receptor-Like Protein  
672 RESPONSIVENESS TO BOTRYTIS POLYGALACTURONASES1. *Plant*  
673 *Physiology*, 164(1), 352–364. <https://doi.org/10.1104/pp.113.230698>  
674 Zhang, Z., Fradin, E., de Jonge, R., van Esse, H. P., Smit, P., Liu, C.-M., & Thomma, B.  
675 P. H. J. (2013). Optimized Agroinfiltration and Virus-Induced Gene Silencing to  
676 Study Ve1-Mediated Verticillium Resistance in Tobacco. *Molecular Plant-Microbe*  
677 *Interactions*, 26(2), 182–190. <https://doi.org/10.1094/MPMI-06-12-0161-R>  
678 Zipfel, C., Kunze, G., Chinchilla, D., Caniard, A., Jones, J. D. G., Boller, T., & Felix, G.  
679 (2006). Perception of the bacterial PAMP EF-Tu by the receptor EFR restricts  
680 Agrobacterium-mediated transformation. *Cell*, 125(4), 749–760.  
681 <https://doi.org/10.1016/j.cell.2006.03.037>

## 682 **Figure Legends**

683  
684 **Figure 1. Agrobacterium and In11-induced changes in *N. benthamiana* gene**  
685 **expression.** A, Venn diagram displaying number of significantly differentially expressed  
686 genes (DEGs) upregulated by Agrobacterium relative to mock-treated tissue. B,  
687 Agrobacterium-downregulated genes. Treatments are labeled as follows: AH,  
688 Agrobacterium + H<sub>2</sub>O, AI, Agrobacterium + In11, H, Mock infiltrated leaf tissue. See Fig.  
689 S1 for treatment details. Top ten genes in both categories with largest log<sub>2</sub>(fold-change)  
690 (FC) are displayed at right. P-value indicates statistical significance with standard Wald  
691 test. Adj. P indicates significance after correction for multiple comparisons (Benjamani-  
692 Hochberg, BH). C, Candidate genes induced by In11 in the presence of Agrobacterium.  
693 While only one DEG was observed after BH correction, 9 genes were induced by In11  
694 uncorrected for multiple comparisons (Fig. S1).

695  
696 **Figure 2. RT-qPCR validation of candidate marker genes.** Boxplots indicate the  
697 mean log<sub>2</sub>(fold change) between water and In11 treated tissue (log<sub>2</sub>(FC) In11 vs H<sub>2</sub>O) of  
698 gene expression from *N. benthamiana* plants expressing either p35s::*PvINR* or an

699 empty vector (EV) over four biological replicates. Student's t-tests were conducted to  
700 determine significance (n.s.: not significant  $p > .05$ , \*:  $p < 0.05$ , \*\*:  $p < 0.01$ , \*\*\*:  $p < 0.001$ ).

701  
702 **Figure 3. A *Nicotiana benthamiana* LYS1 homolog serves as a marker of inceptin**  
703 **response.** A, Leaves were coinfiltrated with *p35s::PvINR* and *pLYS1::LUZ* across the  
704 proximal portion of the leaf, and *p35s::PvINR* and *p2xLYS1::LUZ* across the distal  
705 portion of the leaf. 48 hours after infiltration, one half of the leaf was infiltrated with  
706 sterile water, and the other half was infiltrated with 1  $\mu\text{M}$  In11. Images were obtained 6  
707 hours after peptide treatment, and ASI was quantified in ImageJ. Left, boxplots show  
708 the average ASI of three independent biological replicates. Letters represent  
709 significantly different means (One-way ANOVA and post-hoc Tukey's HSD tests,  $p < .05$ ).  
710 Right, a representative leaf image of one biological replicate is depicted. B, Leaves  
711 were co-infiltrated with *p35s::PvINR* and *p2xLYS1::LUZ* in six distinct regions of the  
712 leaf. 48 hours after infiltration each zone was infiltrated with sterile water or a series of  
713 In11 concentrations. Imaging and quantification were conducted as in A.

714  
715 **Figure 4. The *p2xLYS1::LUZ* construct acts as a generic reporter for plant pattern**  
716 **recognition receptors.** Leaves of *N. benthamiana* plants were coinfiltrated with the  
717 *p2xLYS1::LUZ* reporter construct and either A) empty vector, B) *35s::PvINR*, C)  
718 *35s::AtEFR*, or D) *35s::AtRLP23* in four distinct regions. 48 hours after infiltration, each  
719 region was infiltrated with either sterile water, 1  $\mu\text{M}$  In11, 1  $\mu\text{M}$  elf18, or 1  $\mu\text{M}$  nlp20  
720 peptide. Images were obtained 6 hours after peptide treatment, and ASI was quantified  
721 in ImageJ. Left, boxplots show the average ASI of six independent biological replicates.  
722 Letters represent significantly different means (One-way ANOVA and post-hoc Tukey's  
723 HSD tests,  $p < .05$ ). Right, a representative leaf image of one biological replicate is  
724 depicted.

725  
726 **Figure 5. SOBIR1 is necessary for activation of luminescence by PvINR.** Leaves of  
727 *Nicotiana benthamiana sobir1* knockout plants were coinfiltrated with the  
728 *pFBP\_2xLYS1::LUZ* reporter construct, *p35s::PvINR* and either: empty vector (EV); A)  
729 *p35s::PvSOBIR1*; or B) *p35s::AtSOBIR1*, repeated for three biological replicates. 48  
730 hours after infiltration, each region of interest was infiltrated with either sterile water or 1  
731  $\mu\text{M}$  In11. Images were obtained 6 hours after peptide treatment, and ASI was quantified  
732 in ImageJ. Left, boxplots show the average ASI of three independent biological  
733 replicates. Letters represent significantly different means (One-way ANOVA and post-  
734 hoc Tukey's HSD tests,  $p < .05$ ). Right, a representative leaf image of one biological  
735 replicate is depicted.



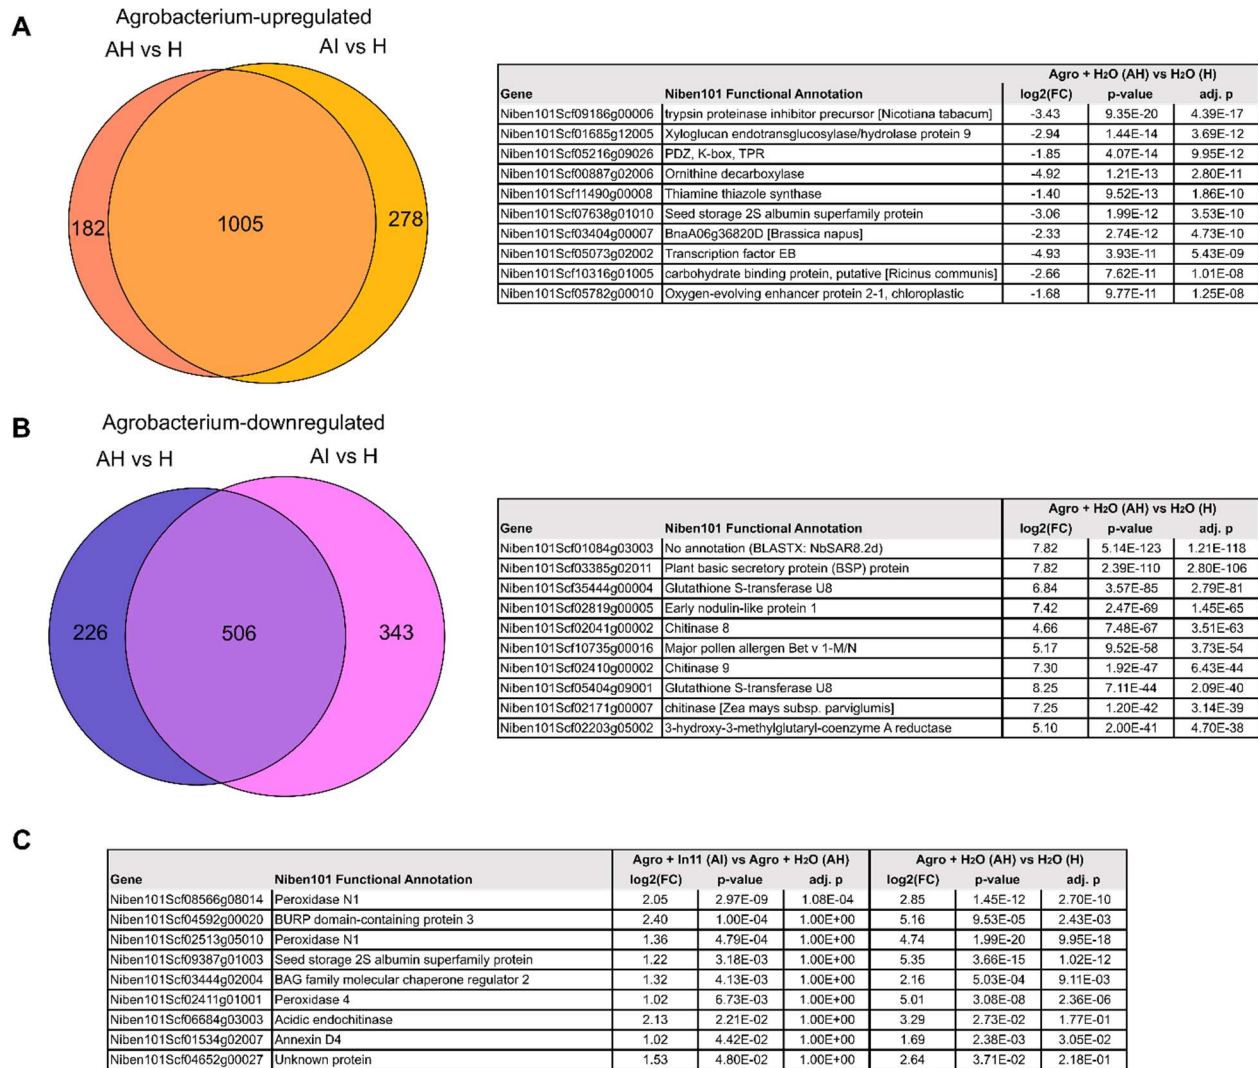

**Figure 1. Agrobacterium and In11-induced changes in *N. benthamiana* gene expression.** A, Venn diagram displaying number of significantly differentially expressed genes (DEGs) upregulated by Agrobacterium relative to mock-treated tissue. B, Agrobacterium-downregulated genes. Treatments are labeled as follows: AH, Agrobacterium + H<sub>2</sub>O, AI, Agrobacterium + In11, H, Mock infiltrated leaf tissue. See Fig. S1 for treatment details. Top ten genes in both categories with largest log<sub>2</sub>(fold-change) (FC) are displayed at right. P-value indicates statistical significance with standard Wald test. Adj. P indicates significance after correction for multiple comparisons (Benjamini-Hochberg, BH). C, Candidate genes induced by In11 in the presence of Agrobacterium. While only one DEG was observed after BH correction, 9 genes were induced by In11 uncorrected for multiple comparisons (Fig. S1).

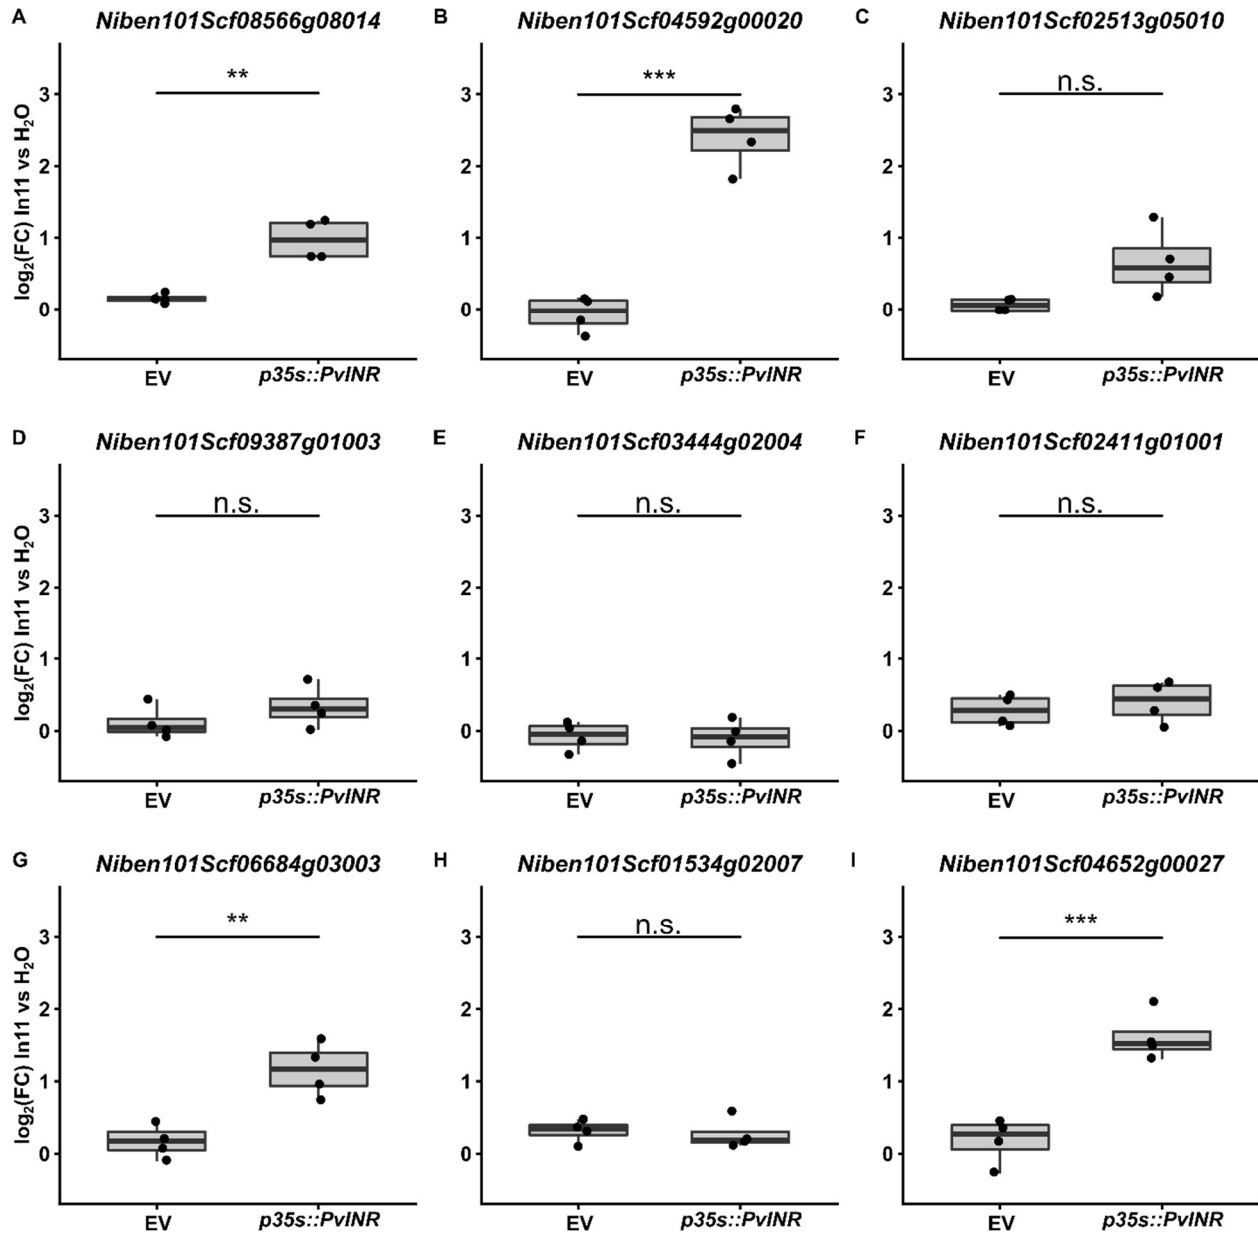

**Figure 2. RT-qPCR validation of candidate marker genes.**

Boxplots indicate the mean  $\log_2(\text{fold change})$  between water and In11 treated tissue ( $\log_2(\text{FC})$  In11 vs H<sub>2</sub>O) of gene expression from *N. benthamiana* plants expressing either p35s::PvINR or an empty vector (EV) over four biological replicates. Student's t-tests were conducted to determine significance (n.s.: not significant p > .05, \*: p < 0.05, \*\*: p < 0.01, \*\*\*: p < 0.001).

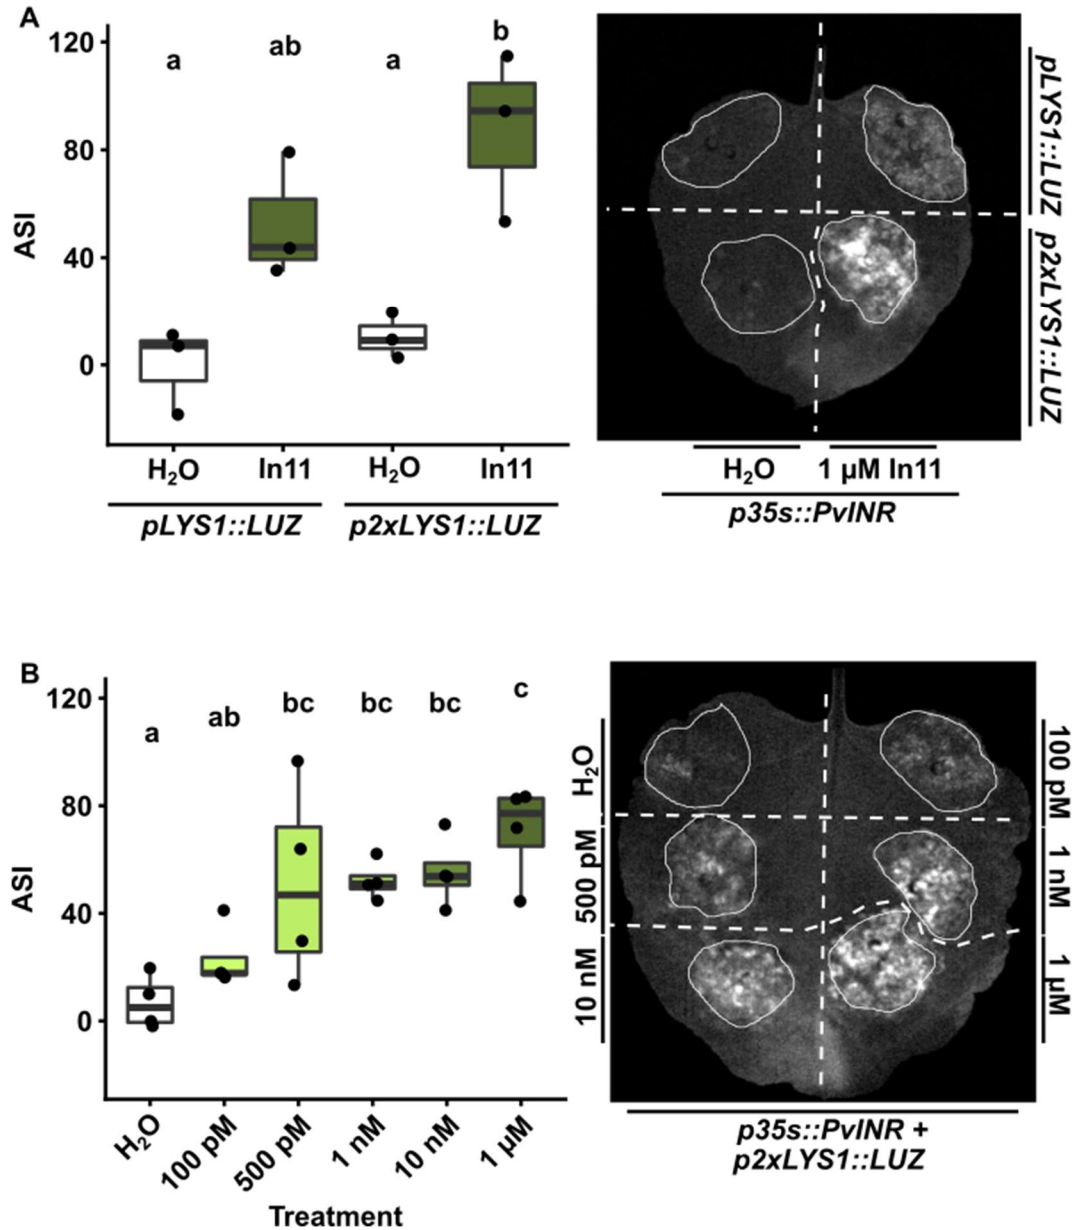

**Figure 3. A *Nicotiana benthamiana* LYS1 homolog serves as a marker of inceptin response.** A, Leaves were coinfiltrated with *p35s::PvINR* and *pLYS1::LUZ* across the proximal portion of the leaf, and *p35s::PvINR* and *p2xLYS1::LUZ* across the distal portion of the leaf. 48 hours after infiltration, one half of the leaf was infiltrated with sterile water, and the other half was infiltrated with 1 μM In11. Images were obtained 6 hours after peptide treatment, and ASI was quantified in ImageJ. Left, boxplots show the average ASI of three independent biological replicates. Letters represent significantly different means (One-way ANOVA and post-hoc Tukey's HSD tests,  $p < .05$ ). Right, a representative leaf image of one biological replicate is depicted. B, Leaves were co-infiltrated with *p35s::PvINR* and *p2xLYS1::LUZ* in six distinct regions of the leaf. 48 hours after infiltration each zone was infiltrated with sterile water or a series of In11 concentrations. Imaging and quantification were conducted as in A.

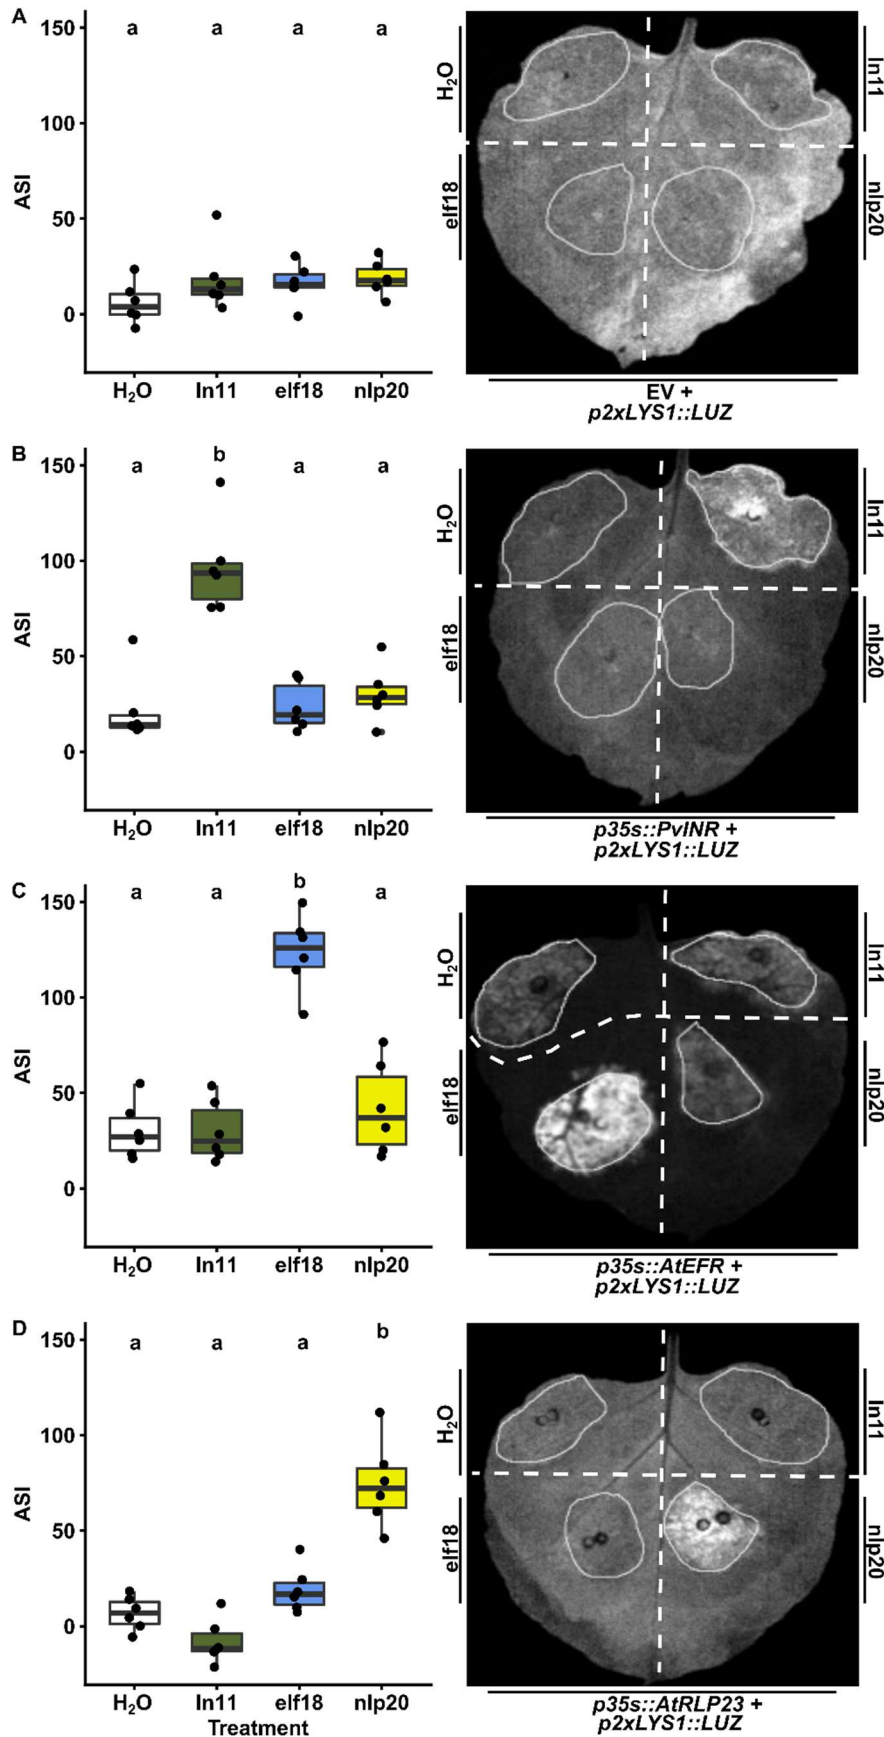

**Figure 4. The *p2xLYS1::LUZ* construct acts as a generic reporter for plant pattern recognition receptors.** Leaves of *N. benthamiana* plants were coinfiltrated with the *p2xLYS1::LUZ* reporter construct and either A) empty vector, B) *35s::PvINR*, C) *35s::AtEFR*, or D) *35s::AtRLP23* in four distinct regions. 48 hours after infiltration, each region was infiltrated with either sterile water, 1  $\mu$ M In11, 1  $\mu$ M elf18, or 1  $\mu$ M nlp20 peptide. Images were obtained 6 hours after peptide treatment, and ASI was quantified in ImageJ. Left, boxplots show the average ASI of six independent biological replicates. Letters represent significantly different means (One-way ANOVA and post-hoc Tukey's HSD tests,  $p < .05$ ). Right, a representative leaf image of one biological replicate is depicted.

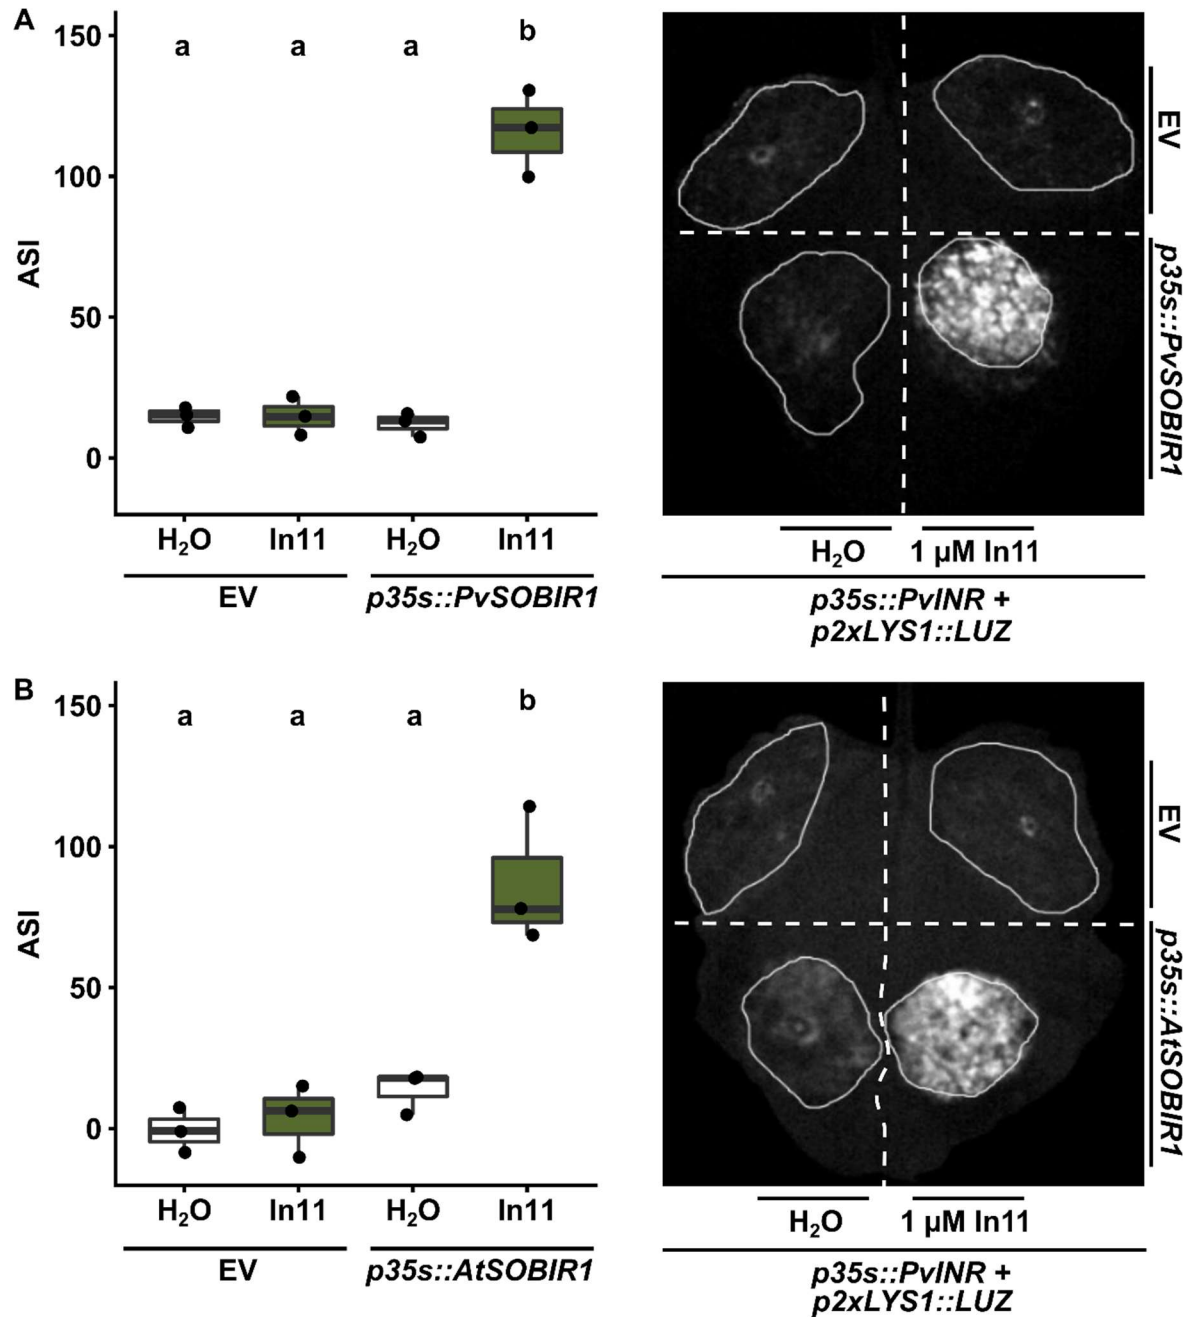

**Figure 5. SOBIR1 is necessary for activation of luminescence by PvINR.** Leaves of *Nicotiana benthamiana sobir1* knockout plants were coinfiltrated with the *pFBP\_2xLYS1::LUZ* reporter construct, *p35s::PvINR* and either: empty vector (EV); A) *p35s::PvSOBIR1*; or B) *p35s::AtSOBIR1*, repeated for three biological replicates. 48 hours after infiltration, each region of interest was infiltrated with either sterile water or 1  $\mu$ M In11. Images were obtained 6 hours after peptide treatment, and ASI was quantified in ImageJ. Left, boxplots show the average ASI of three independent biological replicates. Letters represent significantly different means (One-way ANOVA and post-hoc Tukey's HSD tests,  $p < .05$ ). Right, a representative leaf image of one biological replicate is depicted.

## Supplementary Figures

**Pg 2. Supplementary Figure S1.** Treatment details and transcriptional changes without correction for multiple comparisons.

**Pg 3. Supplementary Figure S2.** A modified FBP construct for rapid cloning and testing of putative promoter regions.

**Pg 4. Supplemental Figure S3.** The putative promoter region of *Niben101Scf08566g08014* does not serve as a marker of In11 response.

**Pg 5. Supplemental Figure S4.** The In11-upregulated gene *Niben101Scf06684g03003.1* is a homolog of *A. thaliana LYS1*.

**Pg 6. Supplementary Figure S5.** The *LYS1* Promoter Drives *LUZ* weaker than the strong constitutive *CaMV35s* promoter.

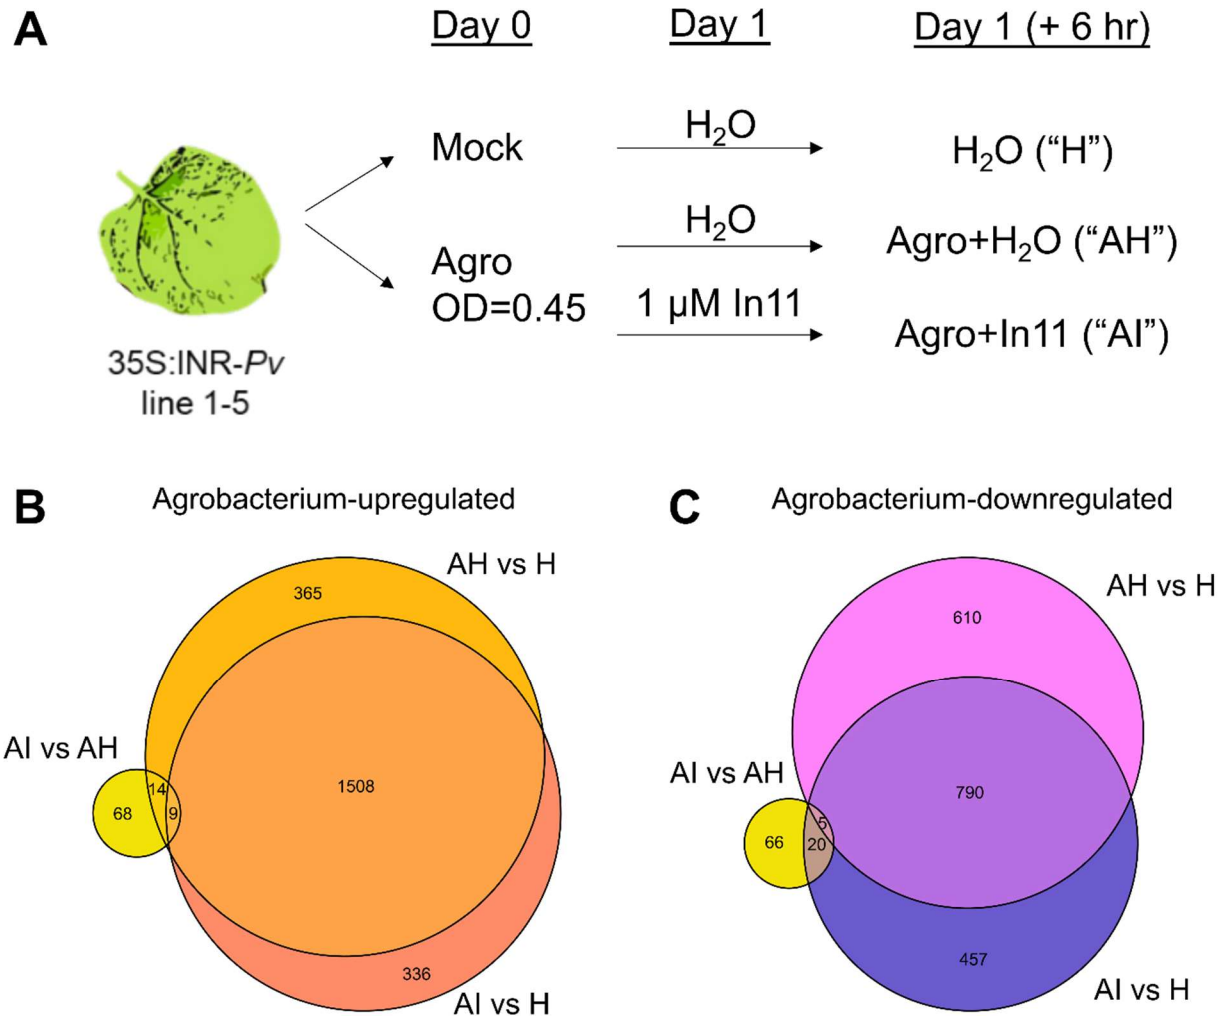

**Supplementary Figure S1. Treatment details and transcriptional changes without correction for multiple comparisons.**

A, *N. benthamiana* line 1-5 was infiltrated with water (mock) or Agrobacterium and then infiltrated at 24 hpi. Three treatments were collected for RNAseq analysis as indicated. Treatments are labeled as follows: AH, Agrobacterium + H<sub>2</sub>O, AI, Agrobacterium + In11, H, Mock infiltrated leaf tissue. B-C, Venn diagram displaying number of genes upregulated by In11 in the presence of Agrobacterium (AI vs AH, yellow) and genes B) upregulated by Agrobacterium or C) downregulated by Agrobacterium (Wald test, p-value < 0.05, no correction for multiple comparisons by Benjamini-Hochberg).

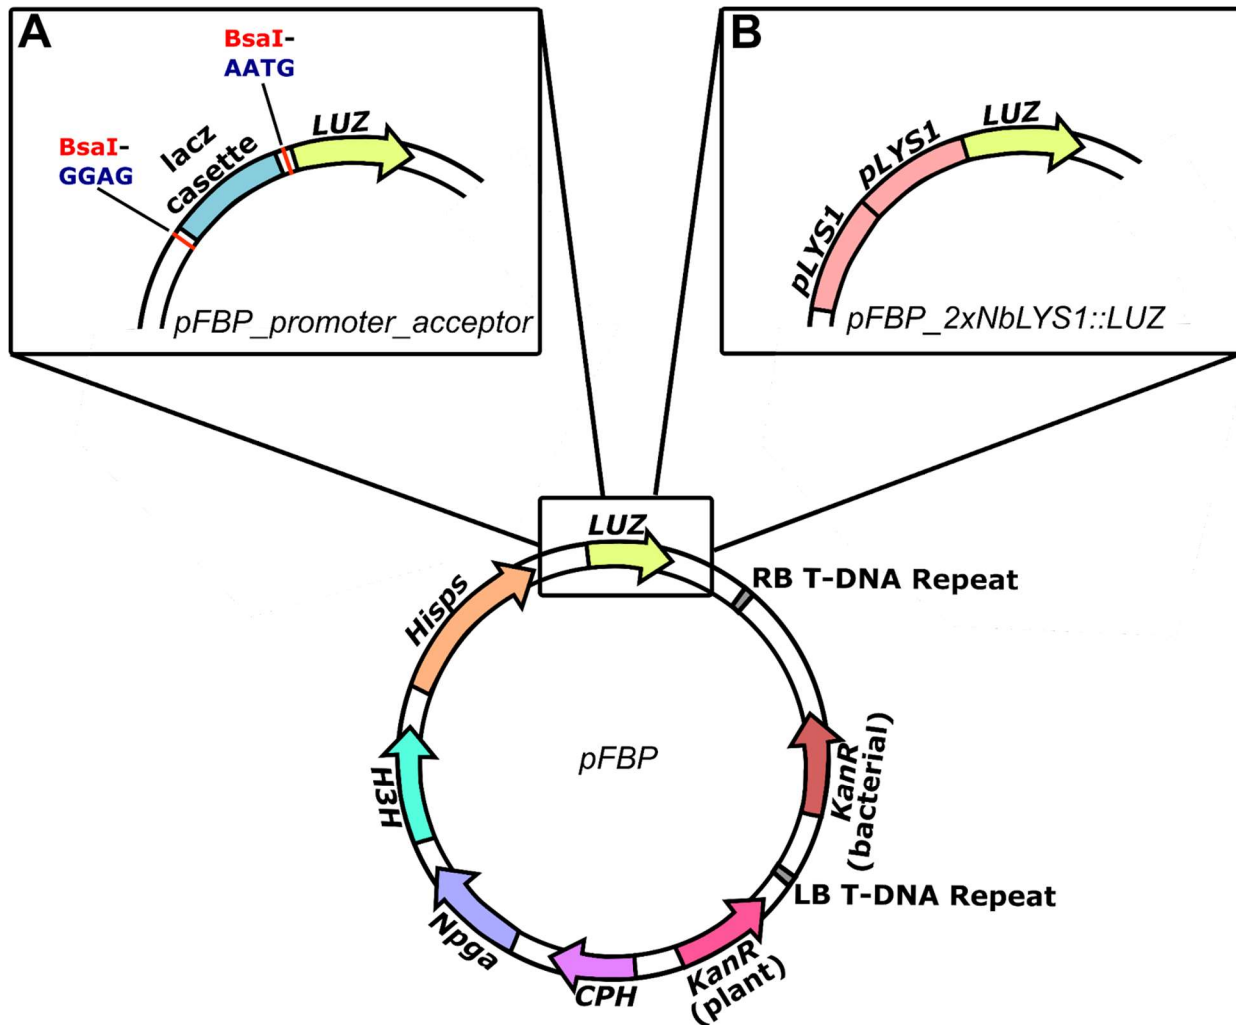

**Supplementary Figure S2. A modified FBP construct for rapid cloning and testing of putative promoter regions.**

A, The *pFBP\_promoter\_acceptor* construct contains a *lacZ* cassette that allows for blue-white screening to facilitate screening of correct clones. This cassette is flanked by *BsaI* recognition sites that exposes GGAG and AATG overhangs upon digestion. These overhangs are compatible with MoClo Promoter +5' Untranslated Region Level 0 constructs. B, The *pFBP\_2xNbLYS1::LUZ* construct places two identical promoter region sequences of a *N. benthamiana* homolog of *A. thaliana* *LYS1* immediately adjacent to the coding sequence of *Neonothopanus nambii* *LUZ*.



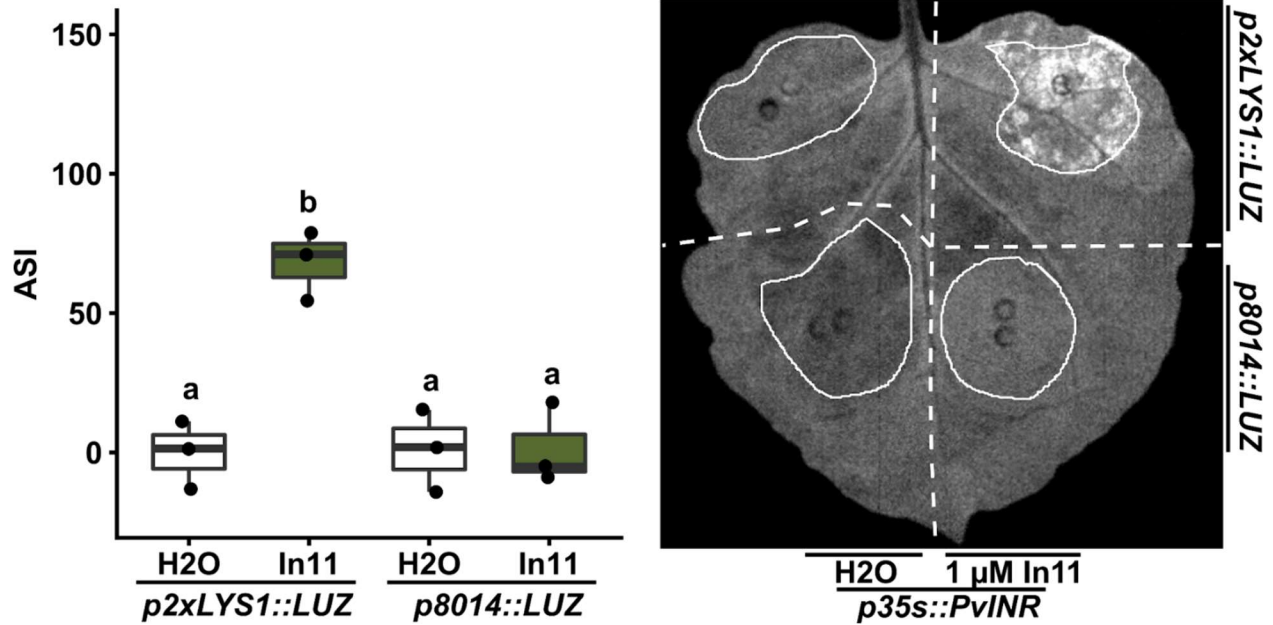

**Supplementary Figure S3. The putative promoter region of *Niben101Scf08566g08014* does not serve as a marker of In11 response.** We generated *p8014::LUZ*, a construct using the putative promoter region of *Niben101Scf08566g08014* to drive *LUZ* expression. Leaves were coinfiltrated with *35s::PvINR* and *pLYS1::LUZ* across the proximal portion of the leaf, and *35s::PvINR* and *p8014::LUZ* across the distal portion of the leaf. 48 hours after infiltration, one half of the leaf was infiltrated with sterile water, and the other half was infiltrated with 1 μM In11. Images were obtained 6 hours after peptide treatment, and ASI was quantified in ImageJ. Left, boxplots show the average ASI of three independent biological replicates. Letters represent significantly different means (One-way ANOVA and post-hoc Tukey's HSD tests,  $p < .05$ ). Right, a representative leaf image of one biological replicate is depicted.

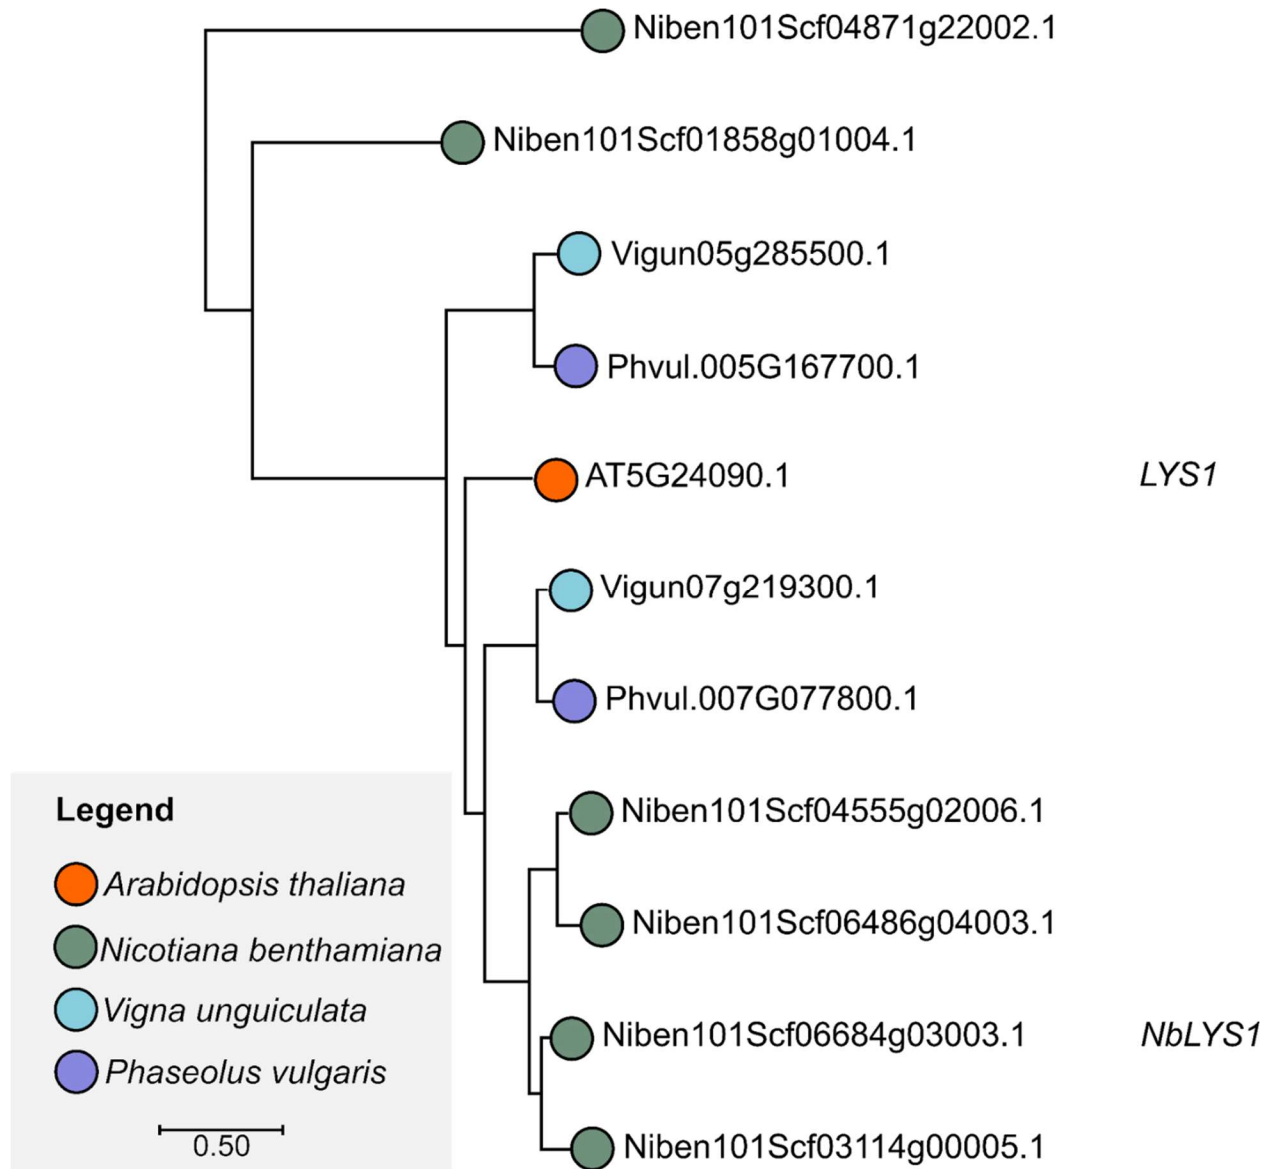

**Supplementary Figure S4. The In11-upregulated gene *Niben101Scf06684g03003.1* is a homolog of *A. thaliana* *LYS1*.** A maximum likelihood tree generated from BLASTN results of the *Niben101Scf06684g03003.1* gene indicates close homology to the characterized *Arabidopsis thaliana* *LYS1* gene.

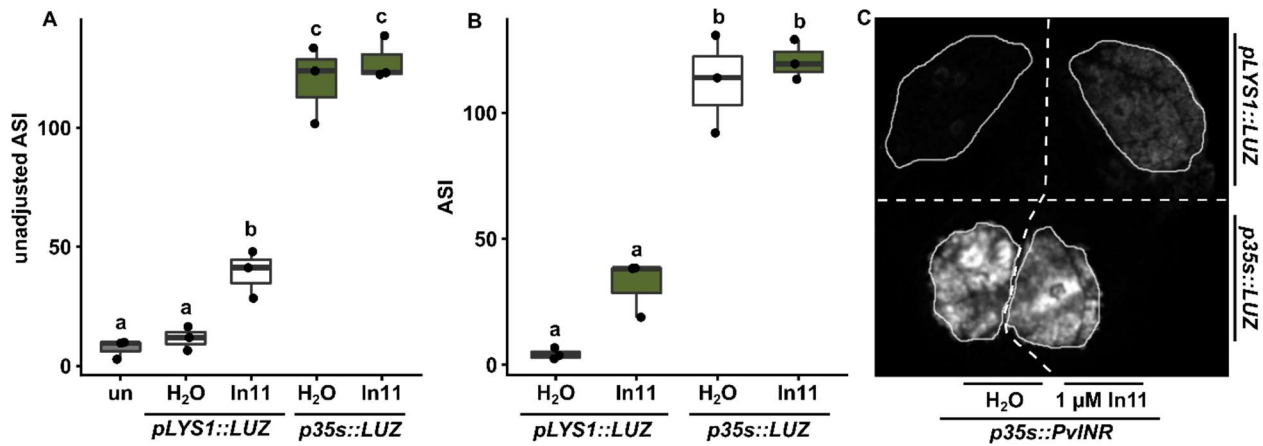

**Supplementary Figure S5. The *LYS1* Promoter Drives *LUZ* weaker than the strong constitutive *CaMV35s* promoter.** *N. benthamiana* leaves were infiltrated with *p35s::PvINR* and *pLYS1::LUZ* across the proximal portion of the leaf, and *p35s::PvINR* and *p35s::LUZ* across the distal portion of the leaf. 48 hpi, each half of the leaf was infiltrated with either water or 1 μM In11. Images were obtained 6 hours after peptide treatment, and average signal intensity (ASI) was quantified using ImageJ. One-way ANOVA and post-hoc Tukey's HSD tests were conducted and summarized as a compact letter display. Statistically significant differences ( $p < .05$ ) among pairwise comparisons are represented by differing letters. A, Unadjusted ASI demonstrates insignificant difference in luminescence produced upon water treatment compared to untransformed and uninfiltrated plant tissue (un). B, Adjusted ASI over three biological replicates reveals relative strengths of expression by the PAMP responsive *NbLYS1* promoter and the strong constitutive *CaMV35s* promoter. C, A representative leaf is shown.
